# Supplementary material for: Brief communication: SWM – stochastic weather model for precipitation-related hazard assessments using ERA5-Land data
Source: Copernicus journal article supplement (doi:10.5194/nhess-24-1929-2024), 2024-06-11
Supplement: Supplementary file 1 [file nhess-24-1929-2024-supplement.pdf]

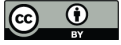

*Supplement of*

**Brief communication: SWM – stochastic weather model for precipitation-related hazard assessments using ERA5-Land data**

**Melody Gwyneth Whitehead and Mark Stephen Bebbington**

*Correspondence to:* Melody Gwyneth Whitehead (m.whitehead@massey.ac.nz)

The copyright of individual parts of the supplement might differ from the article licence.

## Overview

5 This supplement provides the complete set of results from the statistical analyses on both exemplar realisations: *Realisation 1* and *Realisation 2* each of which represent 999 simulated datasets. These are compared to the single real dataset for the Tarawera/Rangitāiki catchment: hourly rainfall data across a 11x14 grid of longitude: {176° E, 176.1° E, ..., 177.0° E} and latitude: {37.8° S, 37.9° S, ..., 39.1° S}, for 40 years (1981 – 2020) downloaded from ERA5-land.

10 Additional comparisons are provided here for rainfall quantiles by month (Figure S3), comparison of monthly rainfall totals (Figure S4), and comparisons of mean, variance, skewness, and proportion of wet periods (Figure S5).

## S1 Monthly means and variance

15 The Shapiro-Wilks normality test (Royston, 1982) was run using the *shapiro.test()* function from *base R*. A significance level of 0.05 was applied, i.e., any test result with  $p < 0.05$  was deemed to have failed the normality test (Table S1).

The Levene test for equal variance was run using the *leveneTest()* function from *car* (Fox and Weisburg, 2019). A significance level of 0.05 was applied, i.e., any test result with  $p < 0.05$  was deemed to have failed the equality of variance test (Table S2).

20 Student's t-test for equality of means (Student, 1908) was run using the *t.test()* function from *base R*. A significance level of 0.05 was applied, i.e., any test result with  $p < 0.05$  was deemed to have failed the normality test (Table S3).

**Table S1: Shapiro-Wilks normality test failure rate (%) by month on mean monthly rainfall**

| Month          | ERA5-land              |             | Realisation 1              | Realisation 2                |
|----------------|------------------------|-------------|----------------------------|------------------------------|
| January        | $p = 0.0004647$        | 1/1 = 100 % | 754/999 = 75 %             | 820 / 999 = 82 %             |
| February       | $p = 0.001508$         | 1/1 = 100 % | 681/999 = 68 %             | 779 / 999 = 78 %             |
| March          | $p = 0.001861$         | 1/1 = 100 % | 466/999 = 47 %             | 548 / 999 = 55 %             |
| April          | $p = 0.009444$         | 1/1 = 100 % | 613/999 = 61 %             | 689 / 999 = 69 %             |
| May            | $p = 0.003474$         | 1/1 = 100 % | 486/999 = 49 %             | 587 / 999 = 59 %             |
| June           | $p = 0.06495$          | 0/1 = 0 %   | 317/999 = 32 %             | 299 / 999 = 30 %             |
| July           | $p = 0.017$            | 1/1 = 100 % | 432/999 = 43 %             | 515 / 999 = 52 %             |
| August         | $p = 0.0947$           | 0/1 = 0 %   | 217/999 = 22 %             | 341 / 999 = 34 %             |
| September      | $p = 0.5795$           | 0/1 = 0 %   | 182/999 = 18 %             | 261 / 999 = 26 %             |
| October        | $p = 0.404$            | 0/1 = 0 %   | 225/999 = 23 %             | 441 / 999 = 44 %             |
| November       | $p = 0.0003$           | 1/1 = 100 % | 283/999 = 28 %             | 468 / 999 = 47 %             |
| December       | $p = 0.434$            | 0/1 = 0 %   | 253/999 = 25 %             | 447 / 999 = 45 %             |
| <b>Overall</b> | <b>7 / 12 = 58.3 %</b> |             | <b>594 / 1140 = 52.1 %</b> | <b>6195 / 11988 = 51.7 %</b> |

25

**Table S2: Levene variance equality test failure rate (%) by month on mean monthly rainfall pairs (real:sample)**

| Month          | ERA5-land : Realisation 1  | ERA5-land : Realisation 2  |
|----------------|----------------------------|----------------------------|
| January        | 10 / 999 = 1 %             | 10 / 999 = 1 %             |
| February       | 66 / 999 = 7 %             | 63 / 999 = 6.3 %           |
| March          | 3 / 999 = 0.3 %            | 5 / 999 = 0.5 %            |
| April          | 9 / 999 = 0.9 %            | 31 / 999 = 3.1 %           |
| May            | 410 / 999 = 41 %           | 52 / 999 = 5.2 %           |
| June           | 103 / 999 = 10 %           | 189 / 999 = 18.9 %         |
| July           | 5 / 999 = 0.5 %            | 5 / 999 = 0.5 %            |
| August         | 9 / 999 = 0.9 %            | 8 / 999 = 0.8 %            |
| September      | 23 / 999 = 2.3 %           | 36 / 999 = 3.6 %           |
| October        | 4 / 999 = 0.4 %            | 36 / 999 = 3.6 %           |
| November       | 26 / 999 = 2.6 %           | 2 / 999 = 0.2 %            |
| December       | 11 / 999 = 1.1 %           | 8 / 999 = 0.8 %            |
| <b>Overall</b> | <b>679 / 11988 = 5.7 %</b> | <b>445 / 11988 = 3.7 %</b> |

**Table S3: Student's t test failure rate (%) by month on mean monthly rainfall pairs (real:sample)**

| Month          | ERA5-land : Realisation 1  | ERA5-land : Realisation 2 |
|----------------|----------------------------|---------------------------|
| January        | 9 / 999 = 0.9 %            | 1 / 999 = 0.1 %           |
| February       | 1 / 999 = 0.1 %            | 1 / 999 = 0.1 %           |
| March          | 2 / 999 = 0.2 %            | 4 / 999 = 0.4 %           |
| April          | 7 / 999 = 0.7 %            | 4 / 999 = 0.4 %           |
| May            | 13 / 999 = 1.3 %           | 15 / 999 = 1.5 %          |
| June           | 21 / 999 = 2.1 %           | 21 / 999 = 2.1 %          |
| July           | 16 / 999 = 1.6 %           | 3 / 999 = 0.3 %           |
| August         | 6 / 999 = 0.6 %            | 3 / 999 = 0.3 %           |
| September      | 6 / 999 = 0.6 %            | 11 / 999 = 1.1 %          |
| October        | 6 / 999 = 0.6 %            | 0 / 999 = 0 %             |
| November       | 12 / 999 = 1.2 %           | 10 / 999 = 1 %            |
| December       | 6 / 999 = 0.6 %            | 3 / 999 = 0.3 %           |
| <b>Overall</b> | <b>105 / 11988 = 0.9 %</b> | <b>76 / 11988 = 0.6 %</b> |

## S2 Significance of month and source for rainfall prediction

Linear models were built for each real : realisation set using the *lm()* function in base R with both month and source as a factor, with *m1* allowing for an interaction term (between month and source), and *m2* not. Accompanying files: *Tukey\_HSD\_Realisation1\_results.txt* and *Tukey\_HSD\_Realisation2\_results.txt* provide all outputs from check 2 for each  
35 realisation. While the *summary()* function for each model does provide an estimate of whether a model coefficient is statistically significant, these p-values are unreliable for pair-wise comparisons because the probability of false detection is over inflated (the family-wise error rate). Thus, Tukey's Honest Significant Difference function is used instead, this was applied using the *TukeyHSD()* function from *base R*. In all cases, the p-value was high ( $> 0.05$ ), indicating that source is not a statistically significant factor in the prediction of rainfall data.

40

*Realisation 1*, model 1: *TukeyHSD()* for whether source is a statistically significant factor,  $p = 0.9871253$

*Realisation 1*, model 2: *TukeyHSD()* for whether source is a statistically significant factor,  $p = 0.9871252$

*Realisation 2*, model 1: *TukeyHSD()* for whether source is a statistically significant factor,  $p = 0.9891186$

*Realisation 2*, model 2: *TukeyHSD()* for whether source is a statistically significant factor,  $p = 0.9891186$

45

## S3 Distribution of monthly rainfall totals

For each of the 999 simulated data in each sample, empirical Cumulative Distribution functions (eCDFs) were built using the *ecdf()* function in *base R*. These were then plotted and overlain by the real eCDF to look for departures, i.e., any locations where the real (ERA5-land) data fell outside of the envelope drawn by the simulated data. Results for *Realisation 1* and  
50 *Realisation 2* are provided in parallel (by month) as Figure S1.

## S4 Temporal trends on daily and monthly timescales

For each of the 999 simulated data in each sample, autocorrelation functions (Venables and Ripley, 2002) were built using the *acf()* function in *base R*. These were then plotted and overlain by the real autocorrelation function to look for departures, i.e.,  
55 any locations where the real (ERA5-land) data fell outside of the envelope drawn by the simulated data. Results for *Realisation 1* and *Realisation 2* are provided in parallel (by month) as Figure S2.

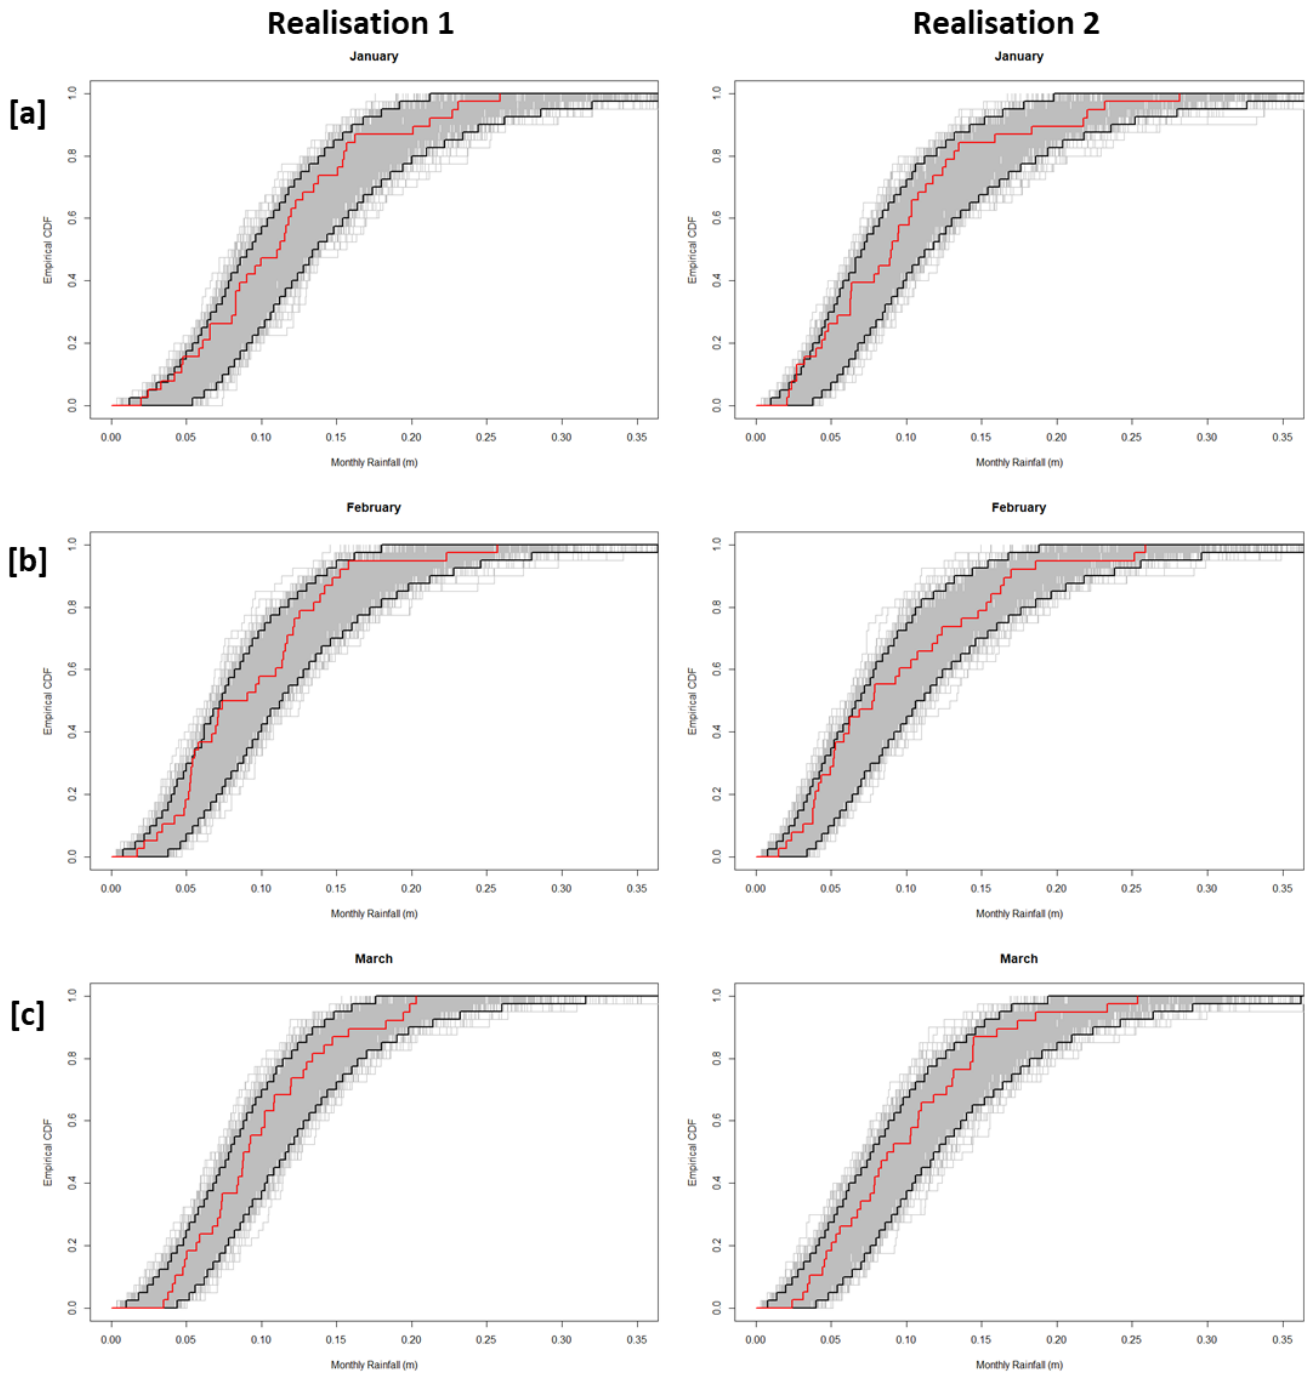

60 **Figure S1: Empirical Cumulative Distribution Functions for simulated (grey) and ERA5-land (red) data for *Realisation 1* and *Realisation 2*, for (a) January, (b) February, and (c) March.**

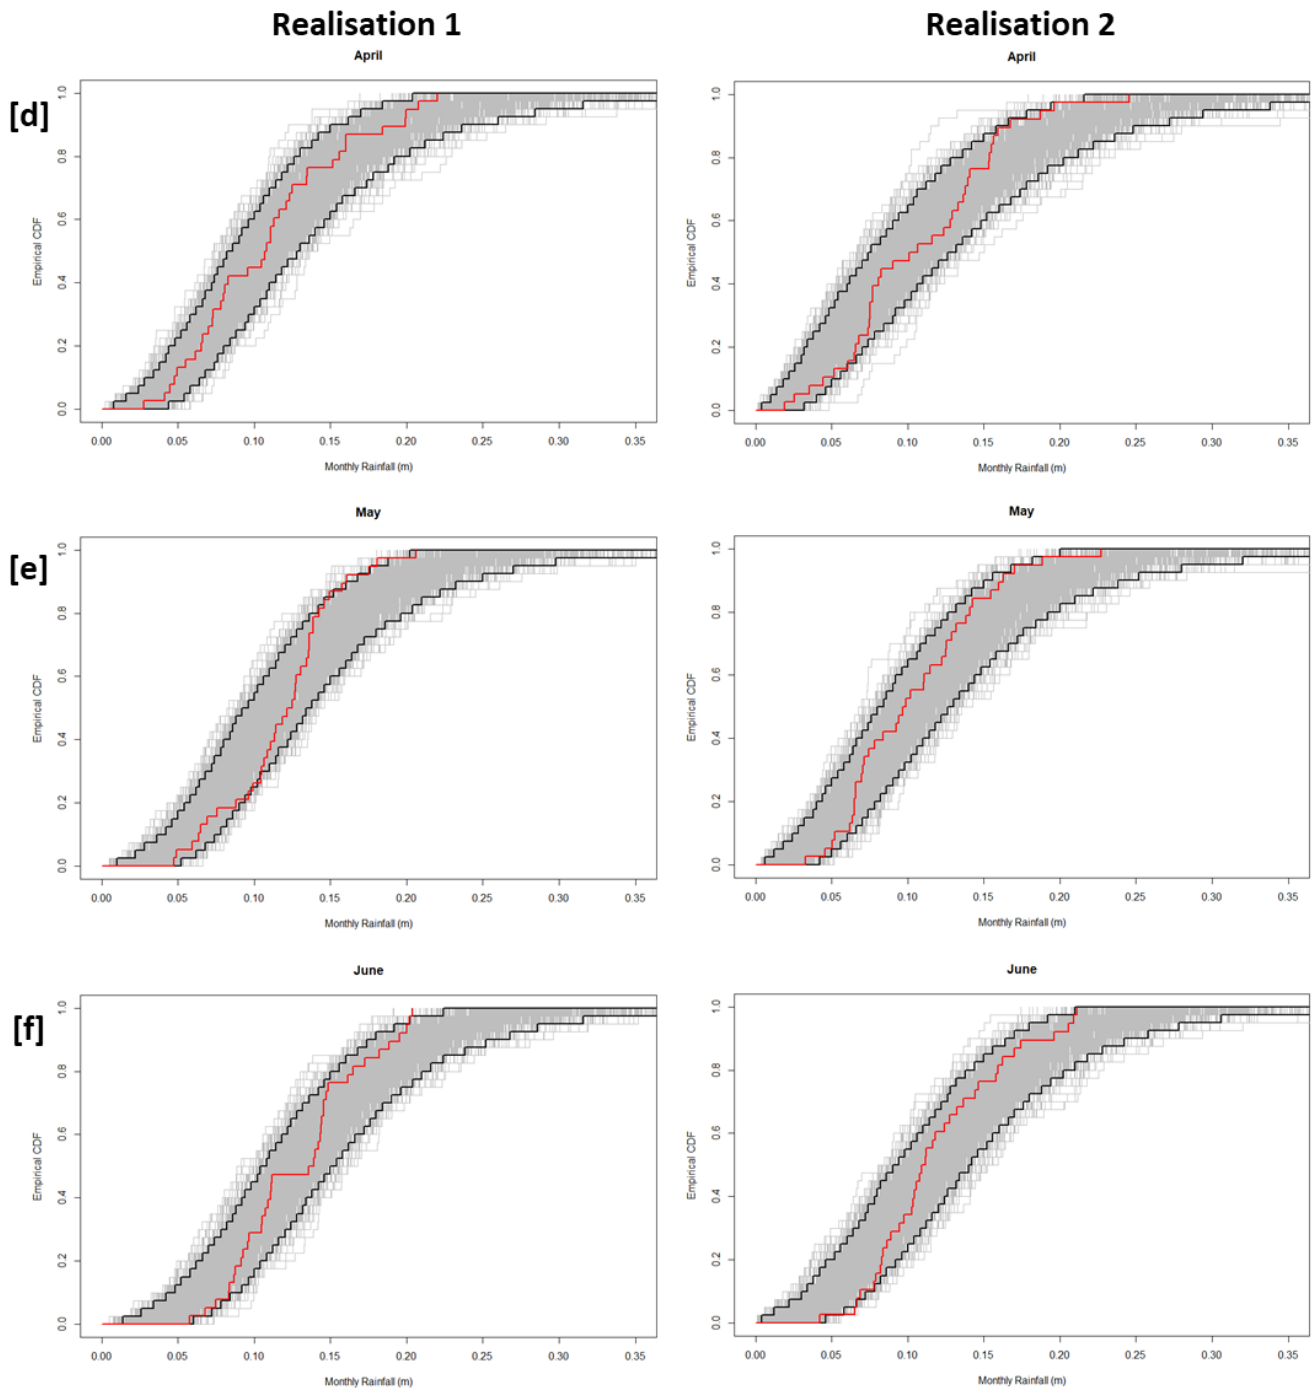

**Figure S1: Empirical Cumulative Distribution Functions for simulated (grey) and ERA5-land (red) data for *Realisation 1* and *Realisation 2*, for (d) April, (e) May, and (f) June.**

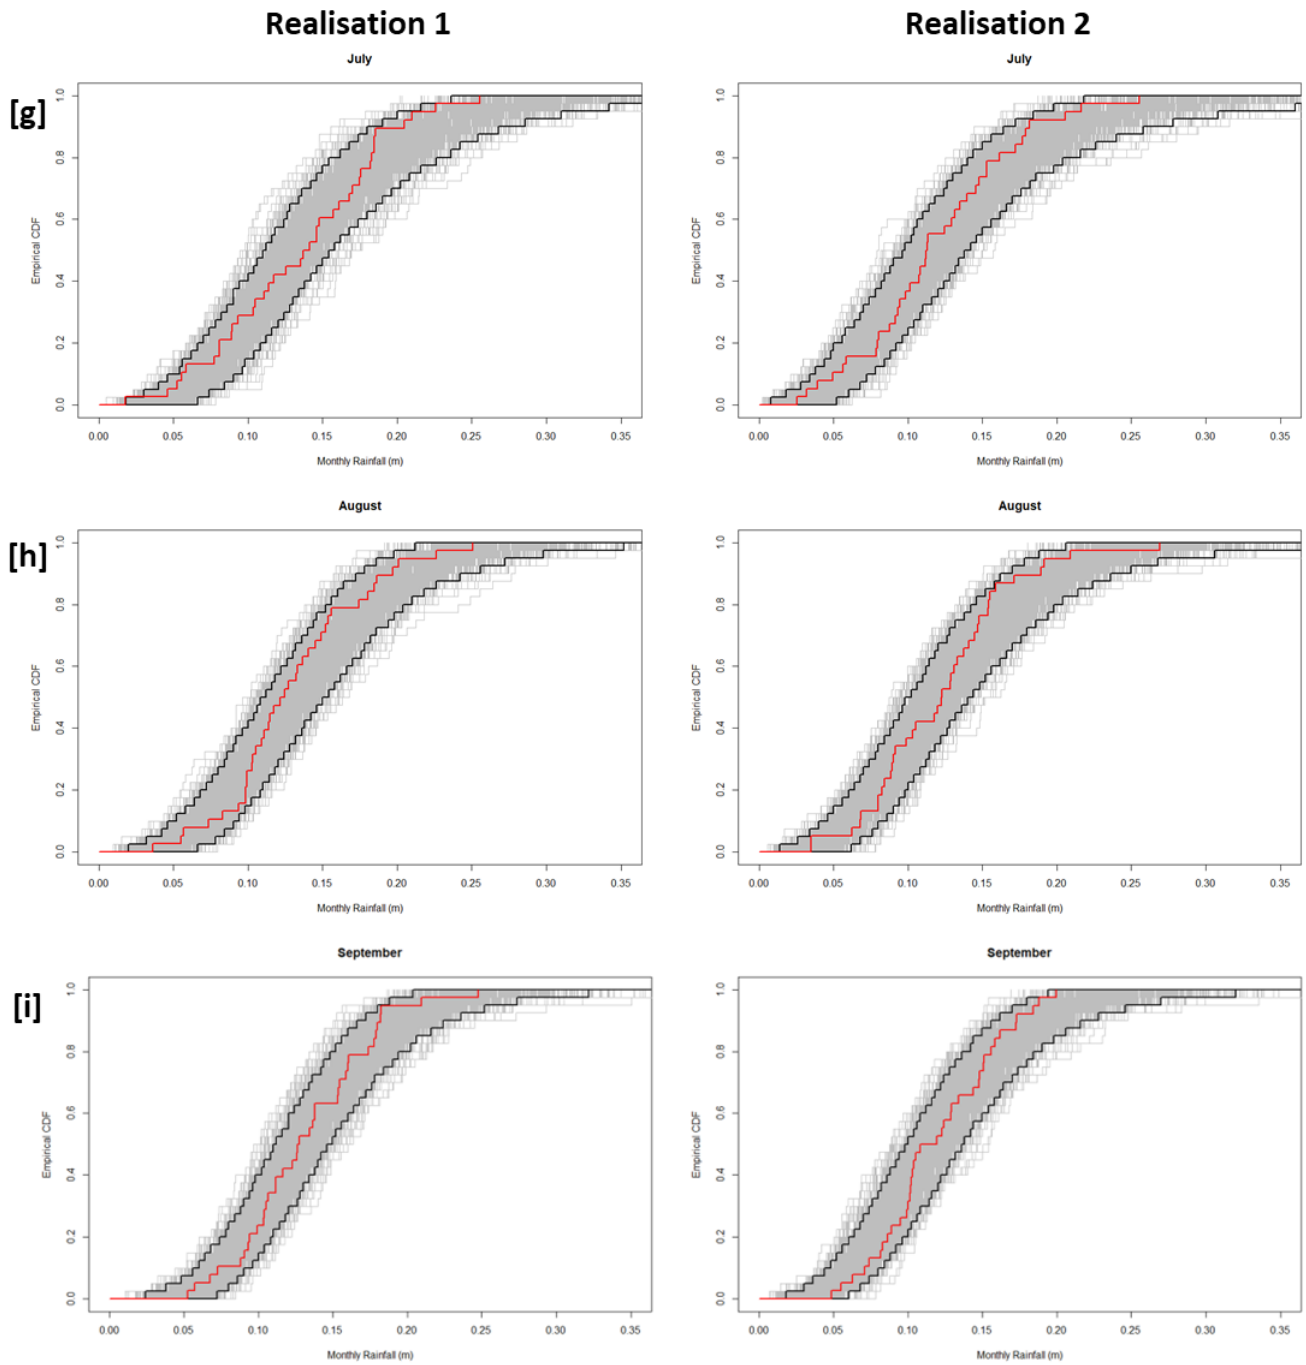

65 **Figure S1:** Empirical Cumulative Distribution Functions for simulated (grey) and ERA5-land (red) data for *Realisation 1* and *Realisation 2*, for (g) July, (h) August, and (i) September.



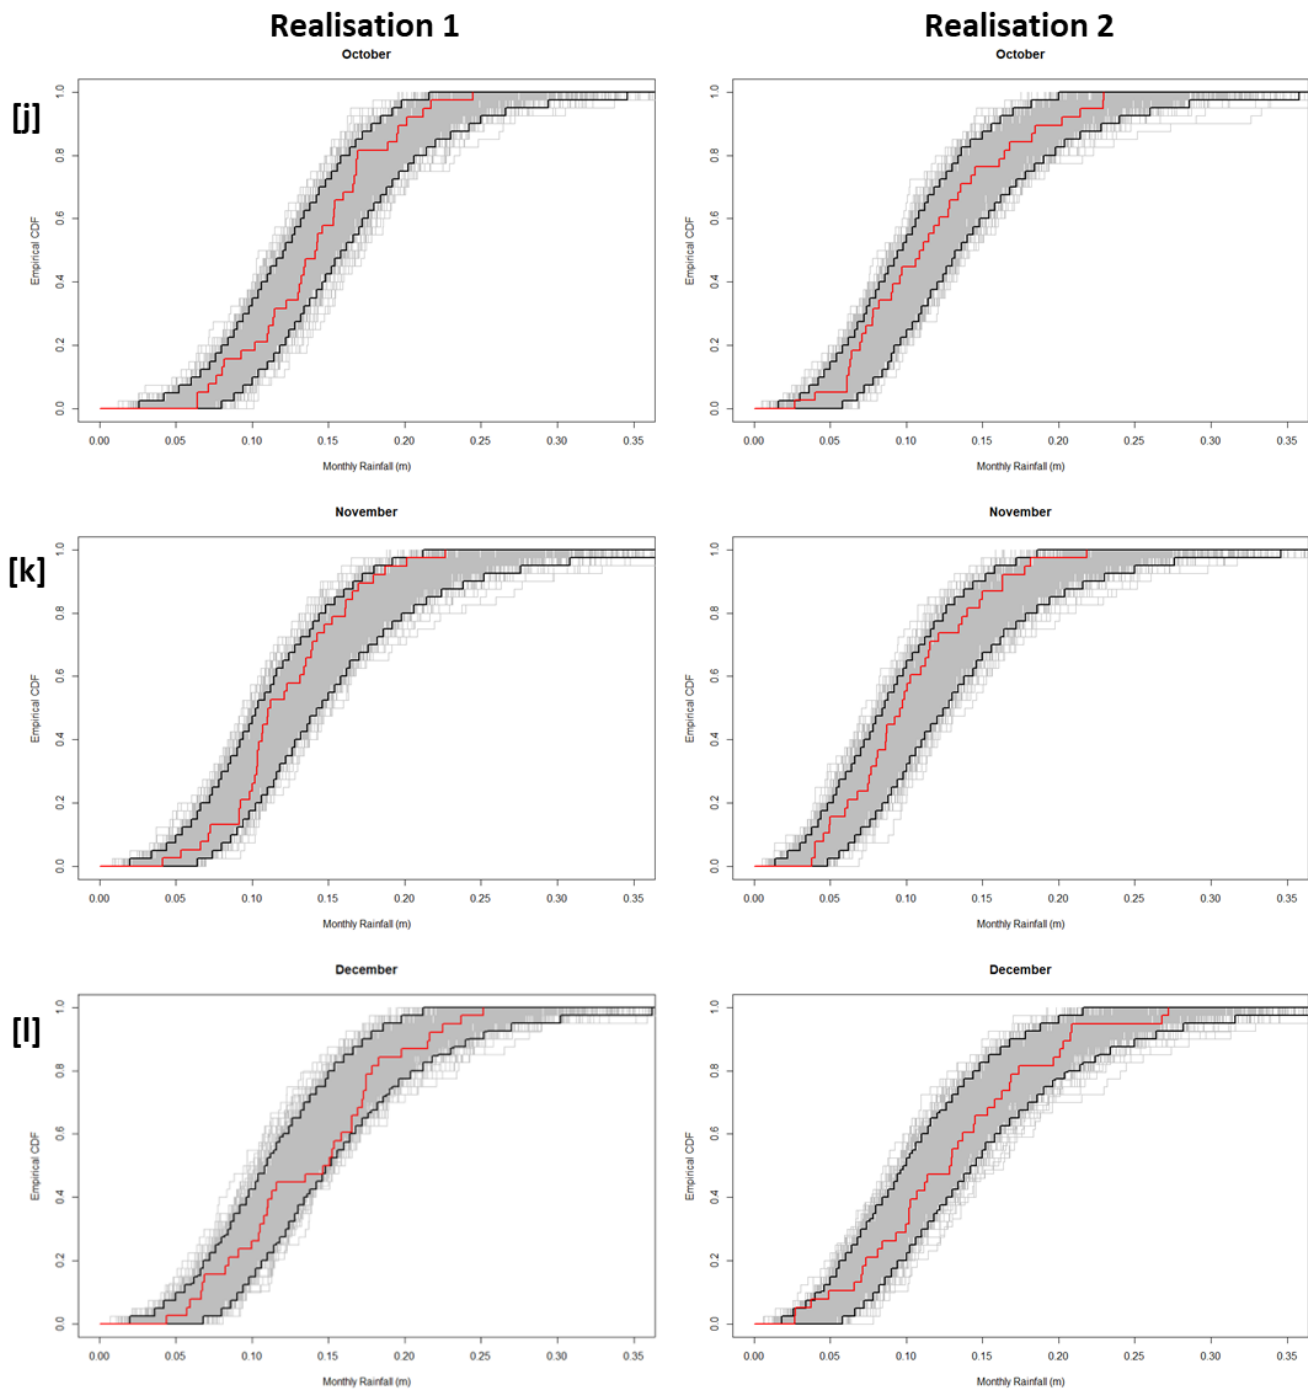

**Figure S1: Empirical Cumulative Distribution Functions for simulated (grey) and ERA5-land (red) data for *Realisation 1* and *Realisation 2*, for (j) October, (k) November, and (l) December.**

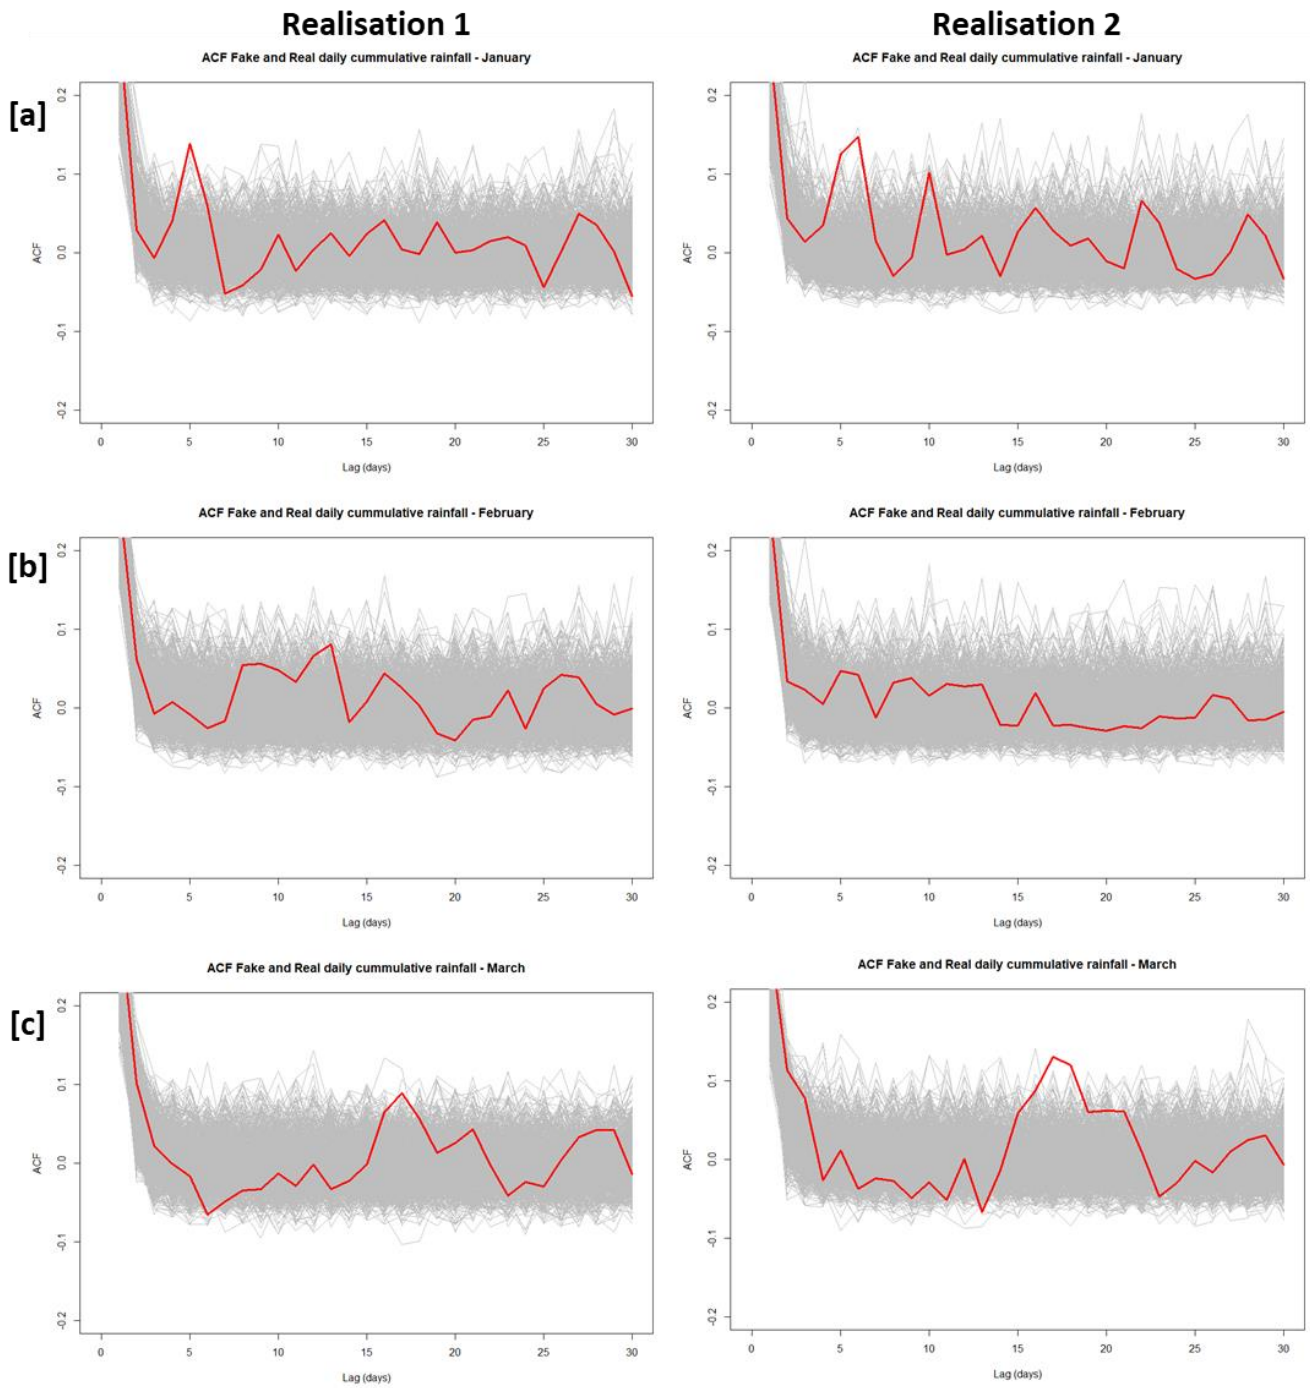

**Figure S2: Autocorrelation Functions for simulated (grey) and ERA5-land (red) data for *Realisation 1* and *Realisation 2*, for (a) January, (b) February, and (c) March.**

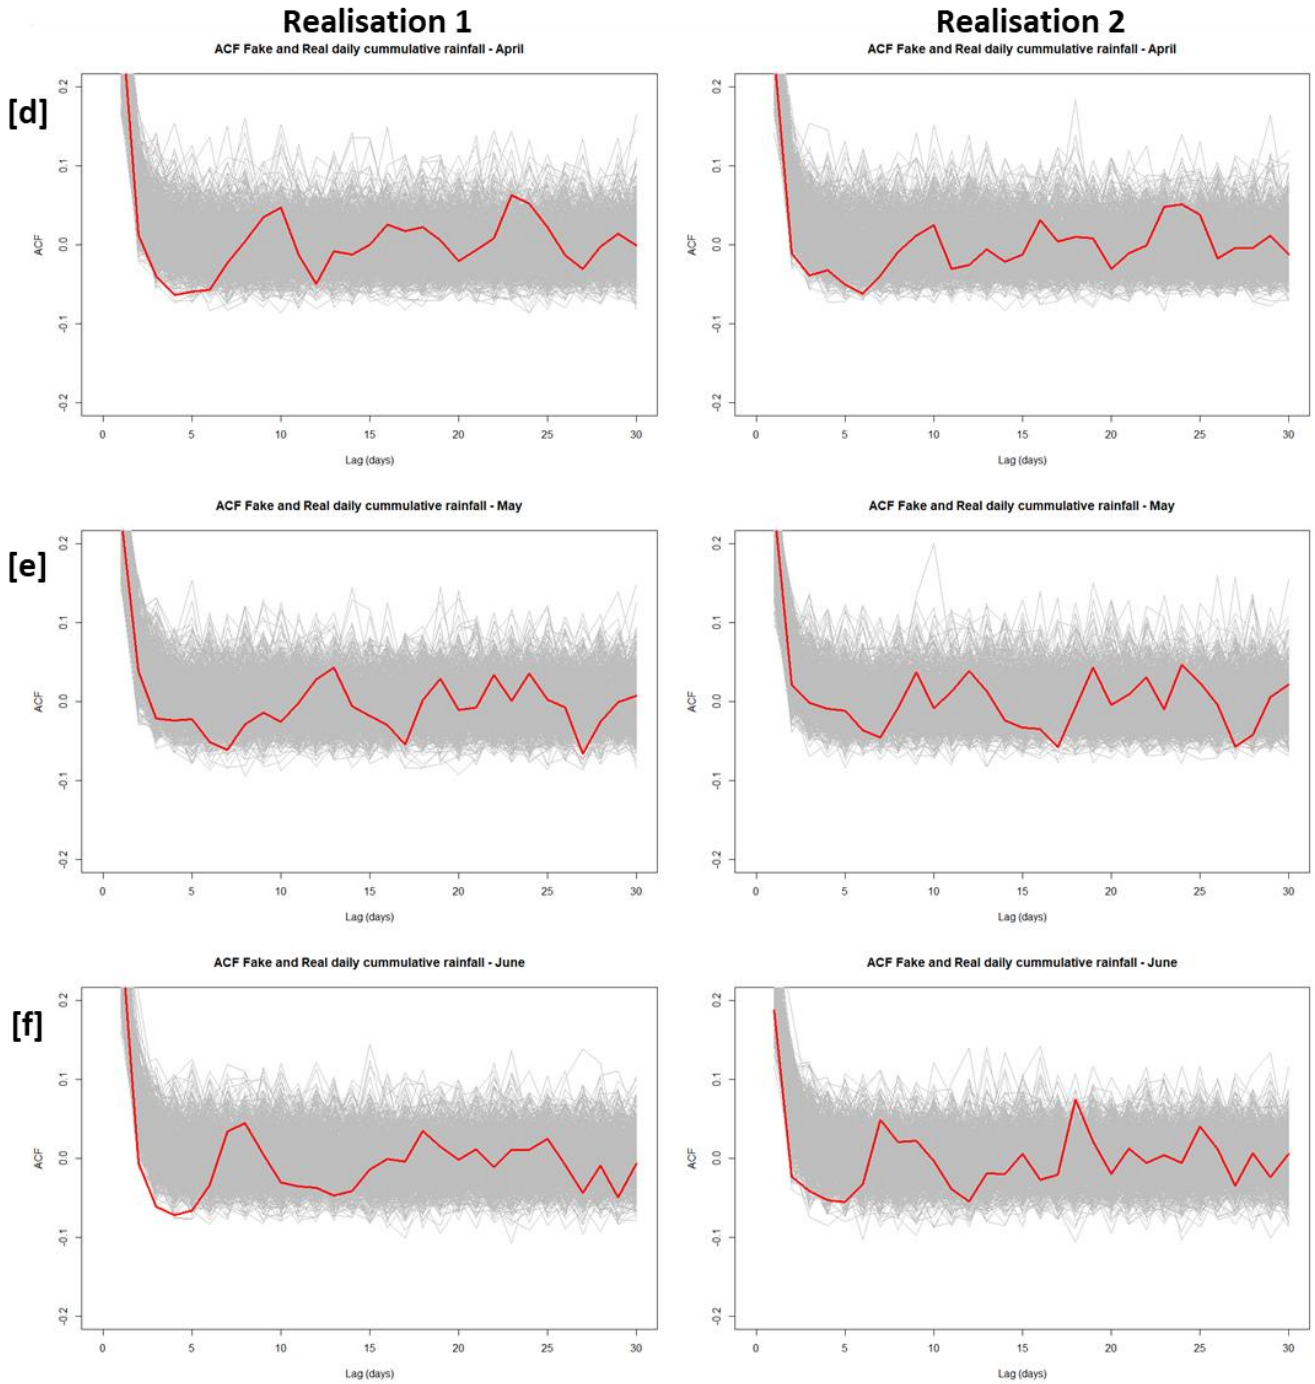

75

Figure S2: Autocorrelation Functions for simulated (grey) and ERA5-land (red) data for *Realisation 1* and *Realisation 2*, for (d) April, (e) May, and (f) June.

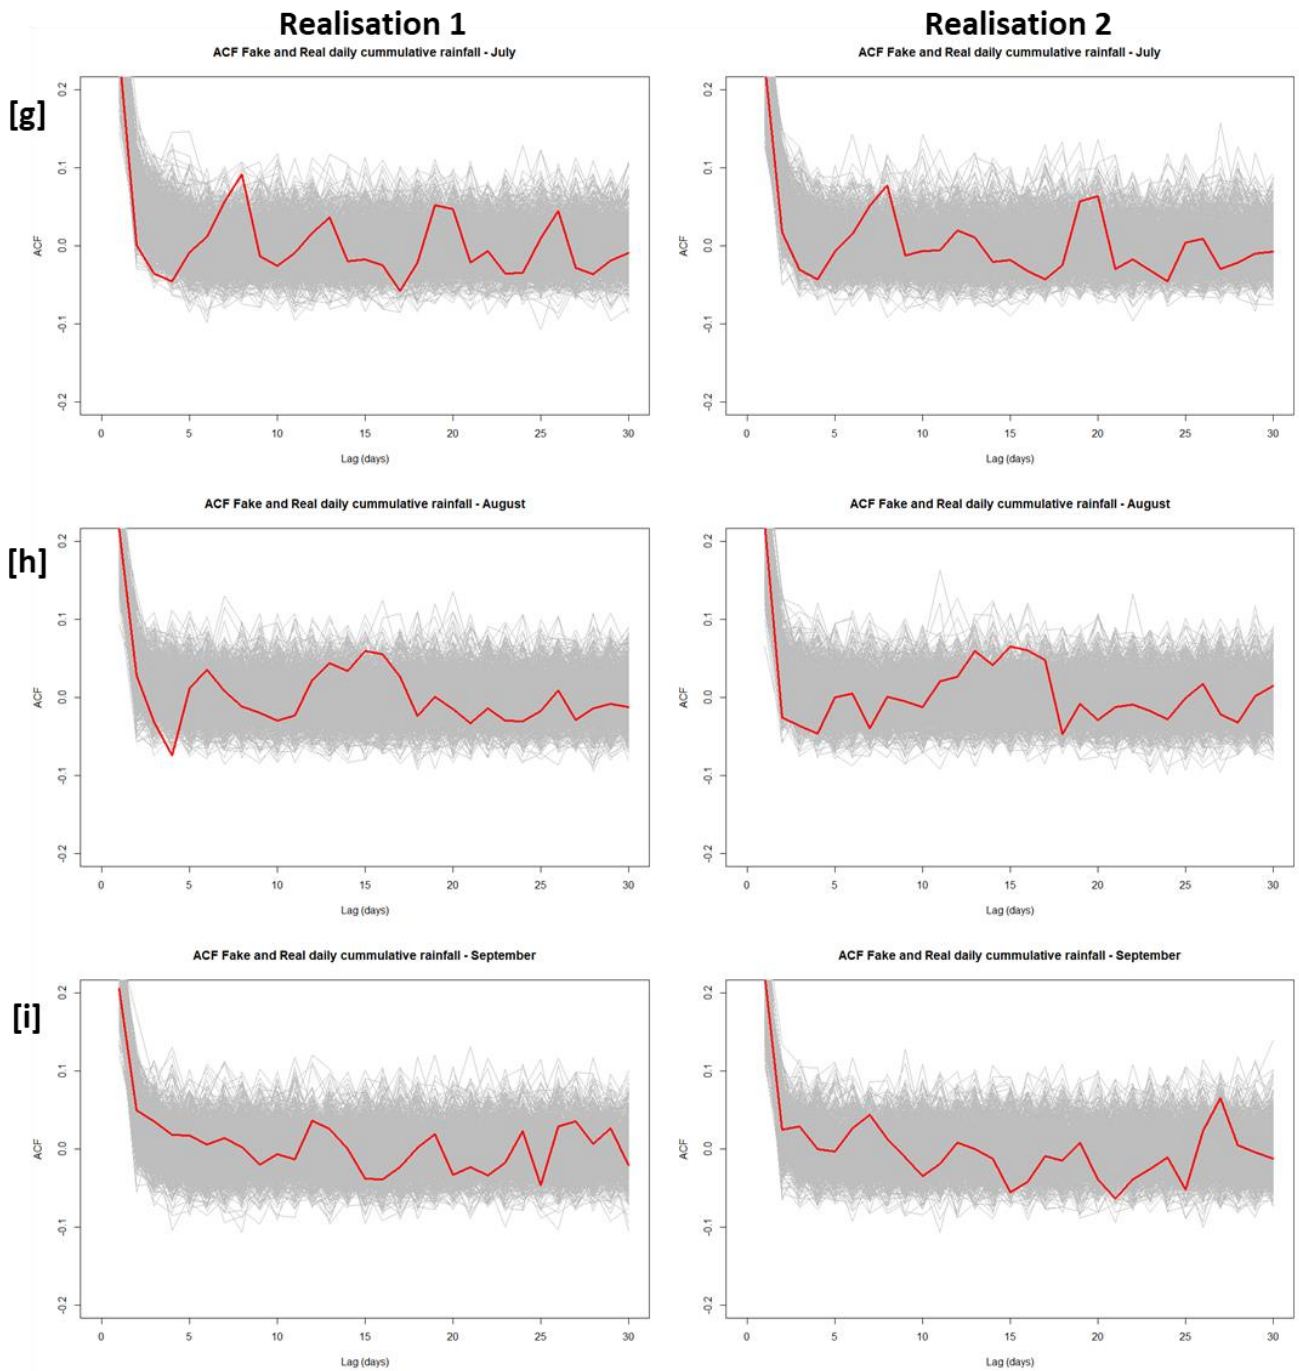

80 **Figure S2: Autocorrelation Functions for simulated (grey) and ERA5-land (red) data for *Realisation 1* and *Realisation 2*, for (g) July, (h) August, and (i) September.**

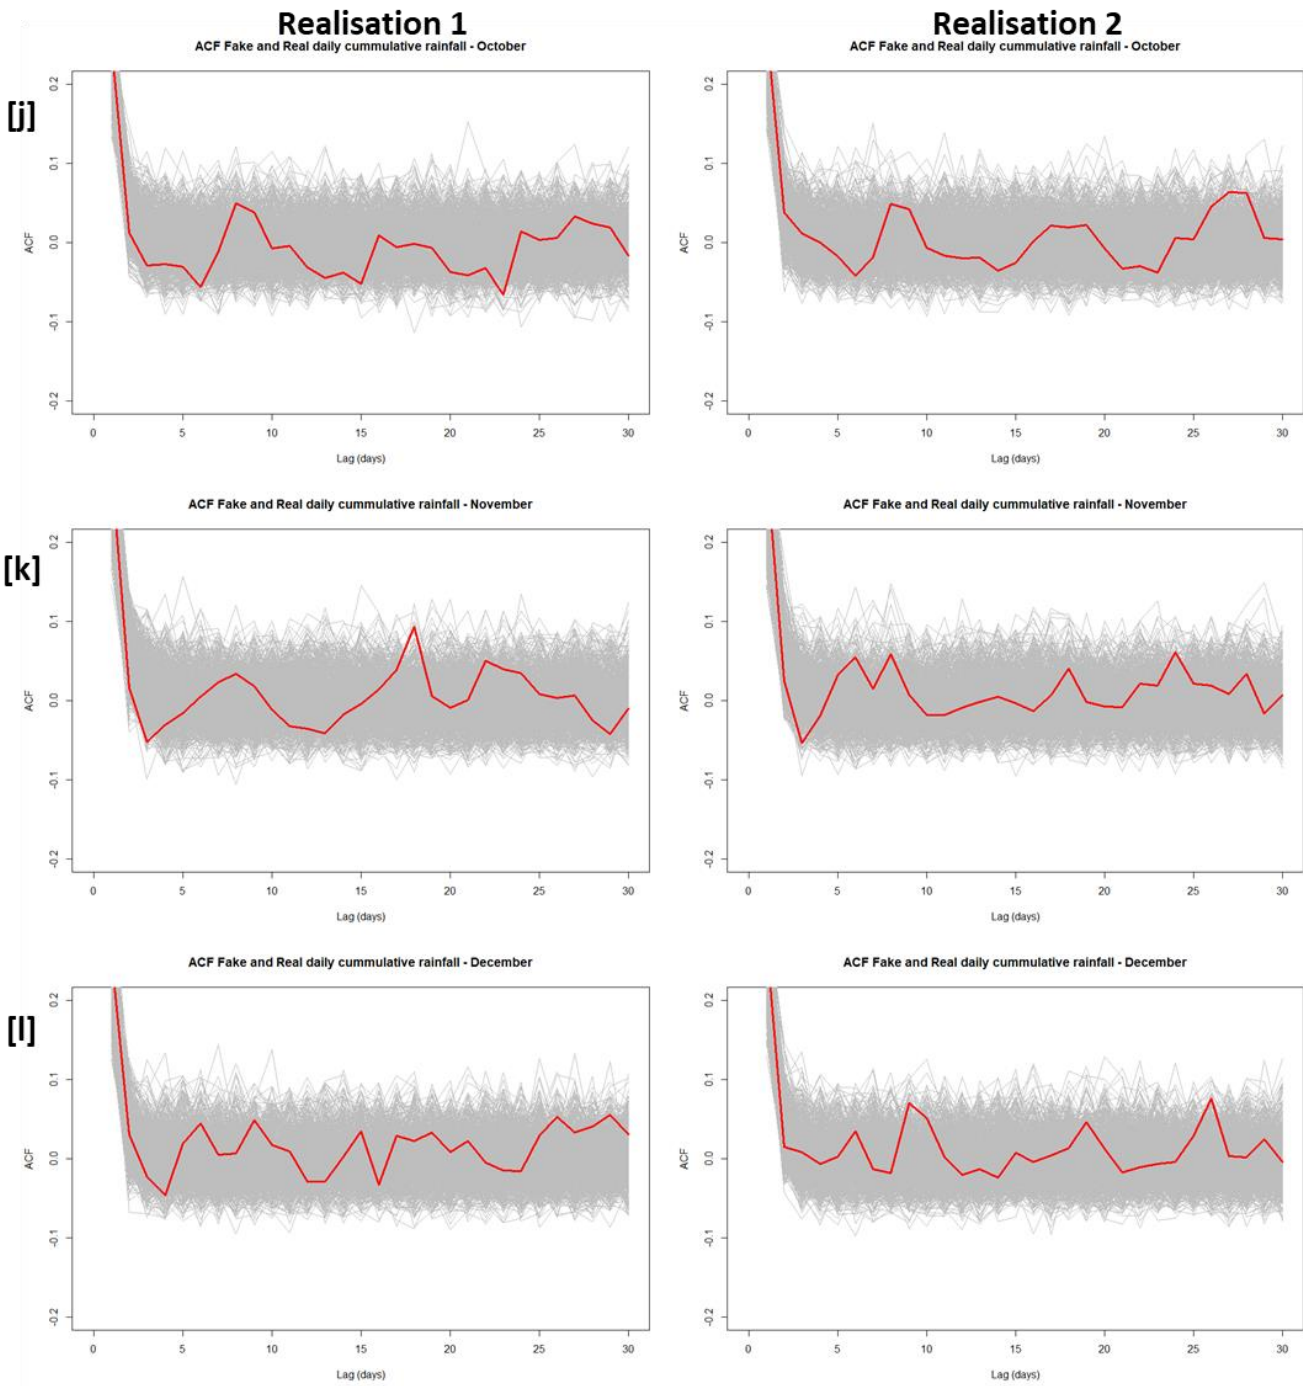

Figure S2: Autocorrelation Functions for simulated (grey) and ERA5-land (red) data for *Realisation 1* and *Realisation 2*, for (j) October, (k) November, and (l) December.

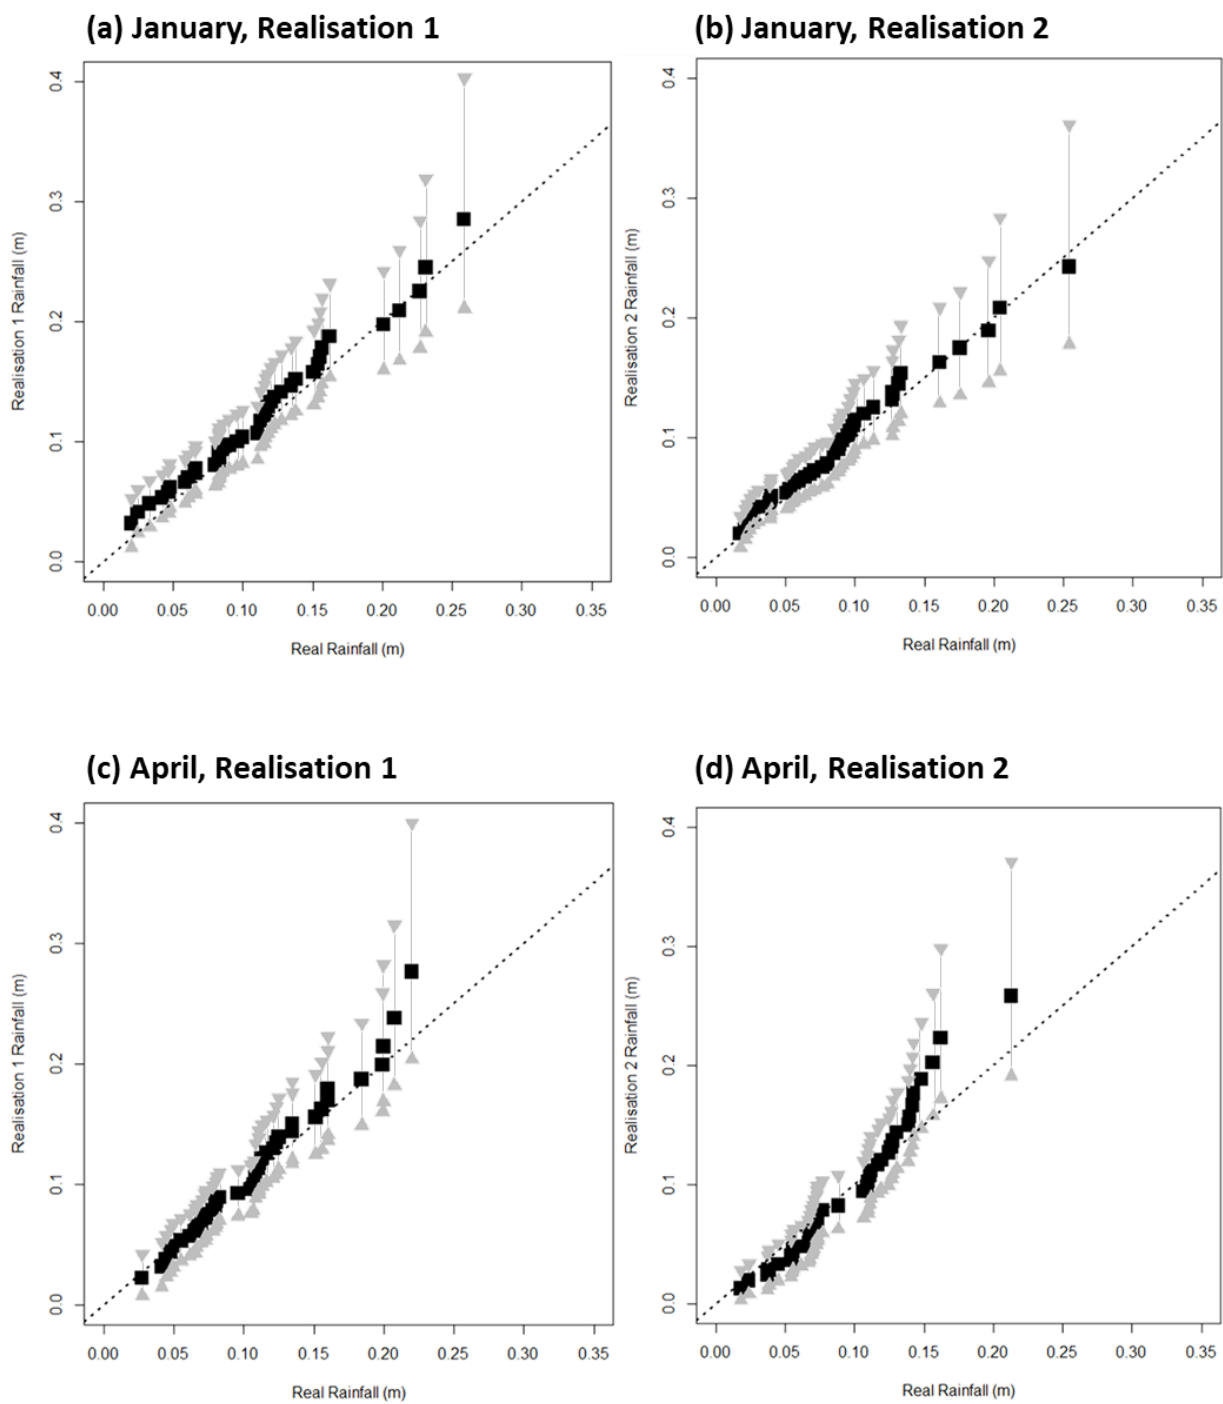

Figure S3: Comparison of observed (ERA5-land) rainfall quantiles (x-axis) and simulated rainfall quantiles (y-axis) for January (a), (b), and April (c), (d) monthly rainfalls. Black squares represent median of 999 simulations for each realisation, with grey arrows representing 95<sup>th</sup> percentiles.



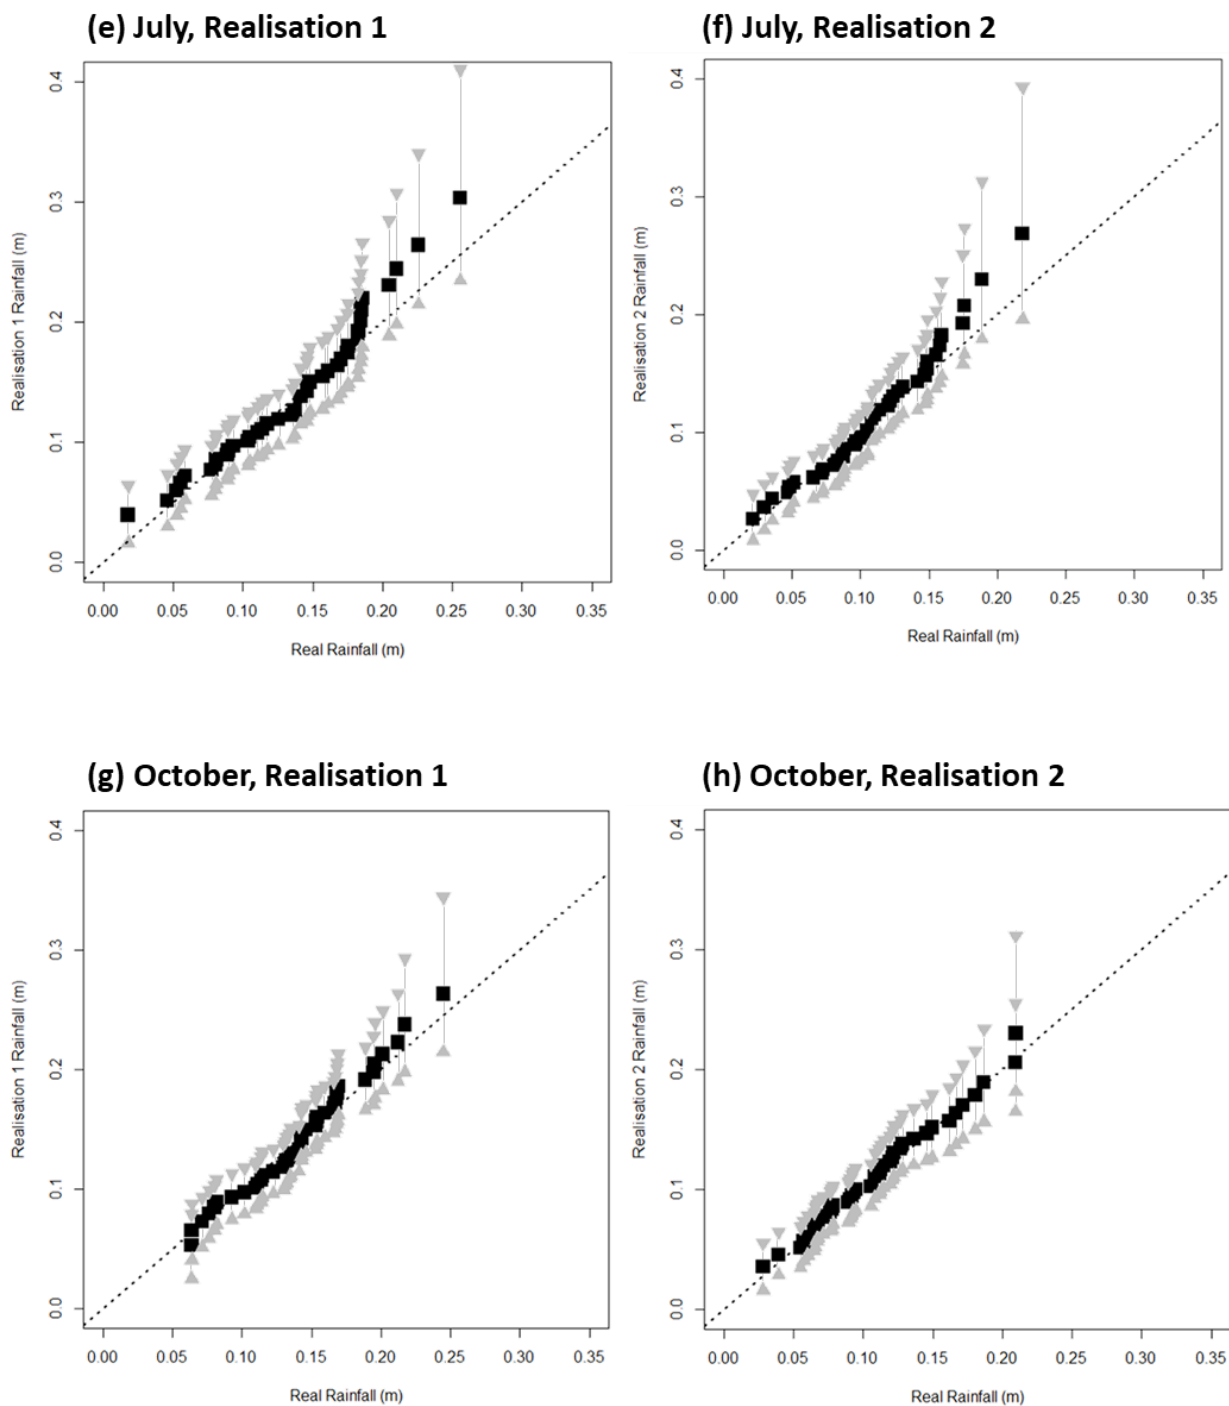

Figure S3: Comparison of observed (ERA5-land) rainfall quantiles (x-axis) and simulated rainfall quantiles (y-axis) for July (e), (f), and October (g), (h) monthly rainfalls. Black squares represent median of 999 simulations for each realisation, with grey arrows representing 95<sup>th</sup> percentiles.

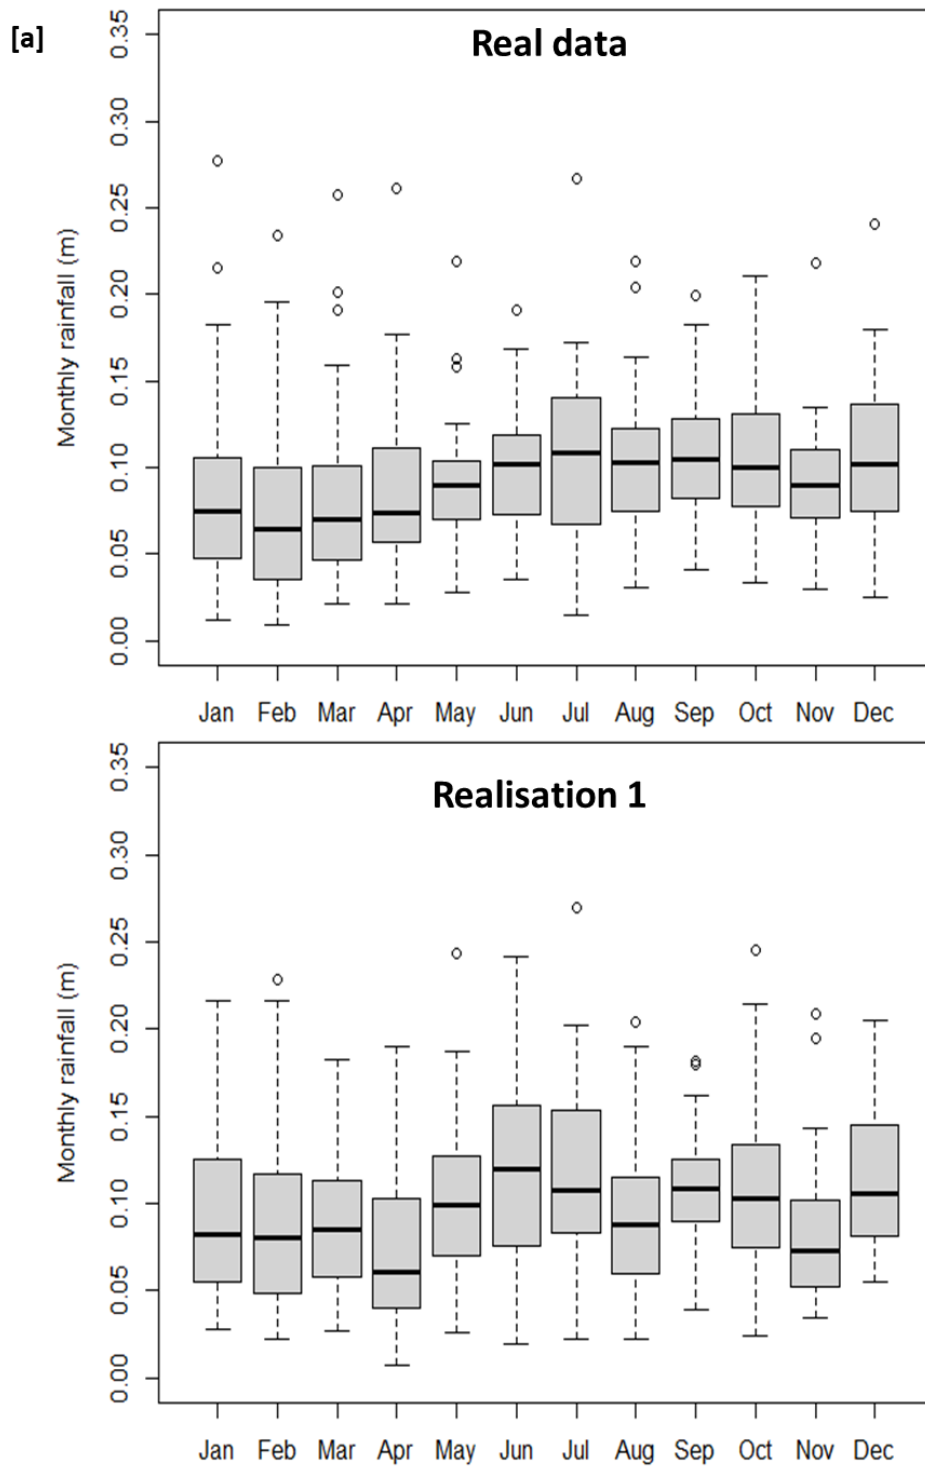

Figure S4: Comparison of monthly rainfall totals, (a) ERA5-land data and Realisation 1, comparison location shown as white box in Figure 3 (main text).



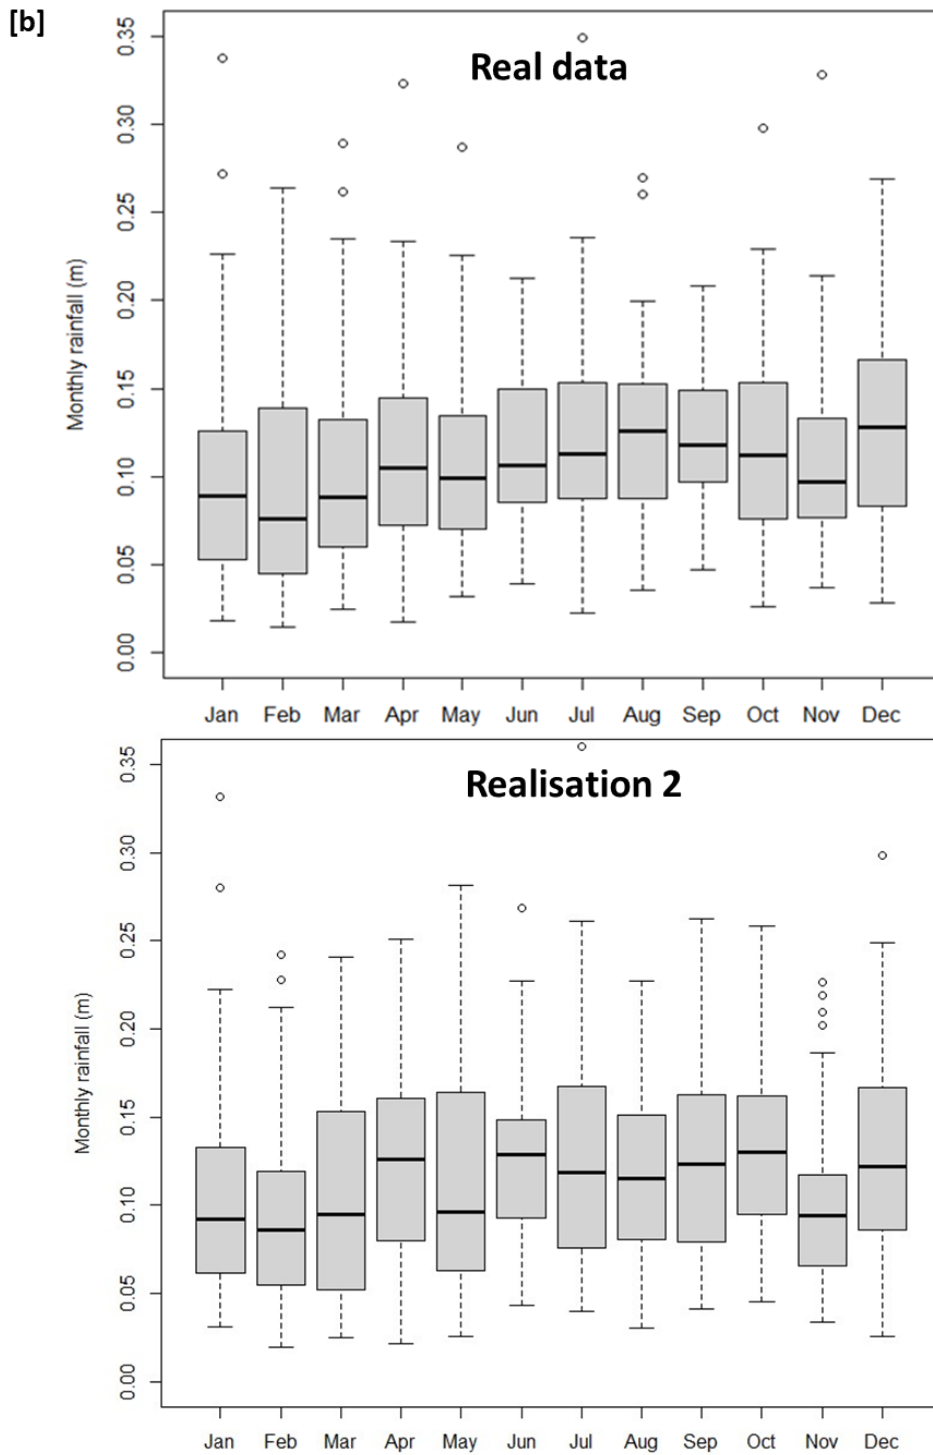

100 **Figure S4: Comparison of monthly rainfall totals, (b) ERA5-land data and Realisation 2, comparison location shown as pink box in Figure 3 (main text).**

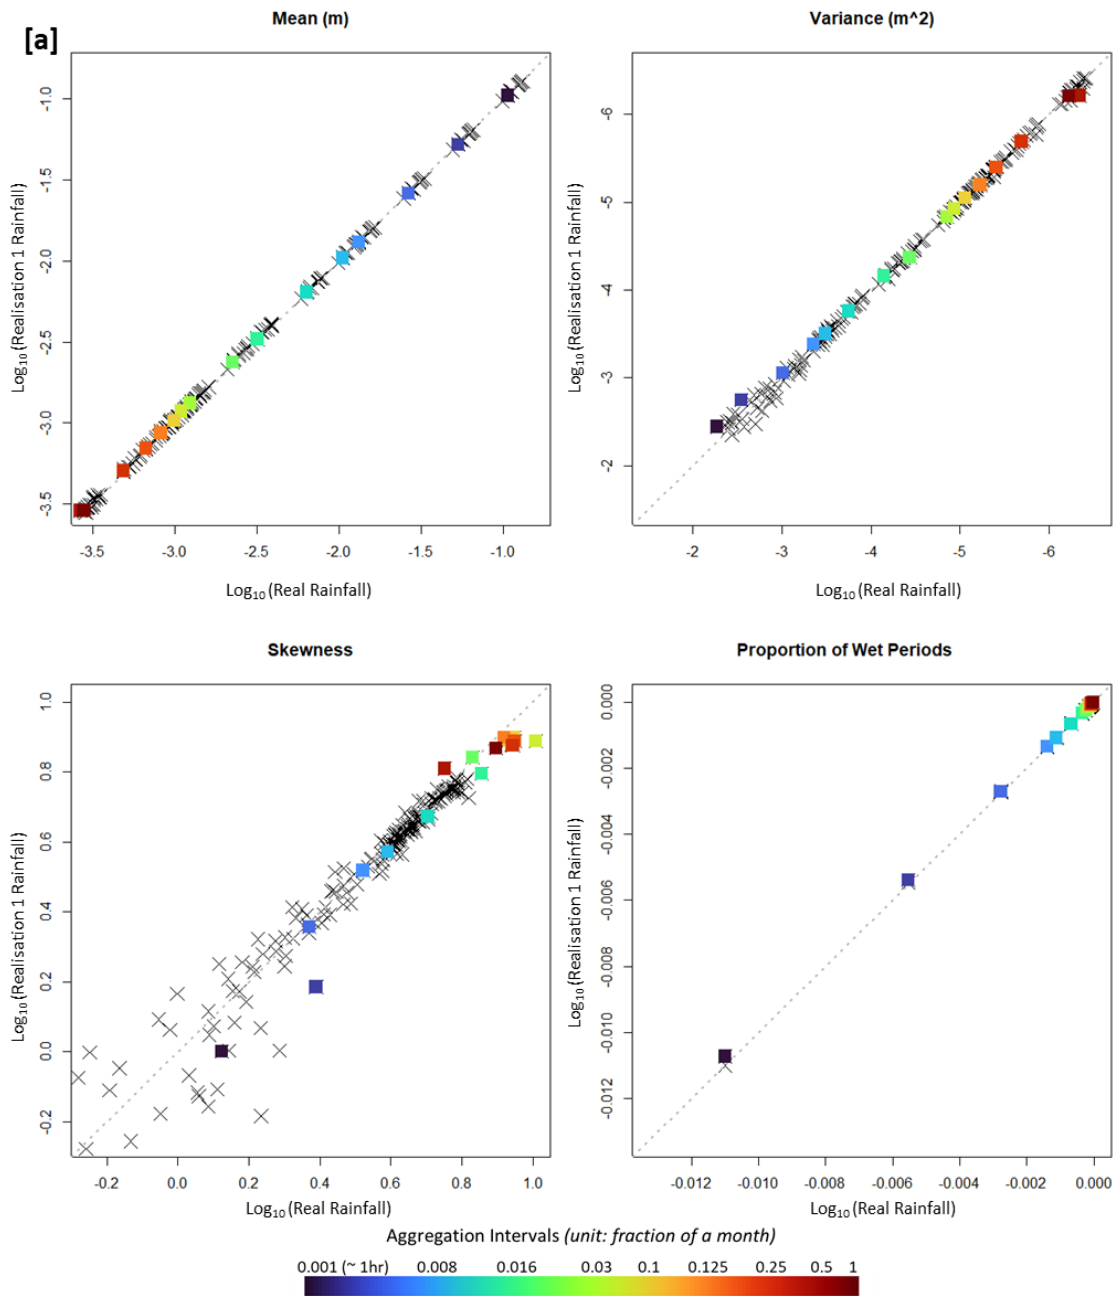

105 **Figure S5: Mean, variance, skewness, and proportion of wet periods of the observed (x-axis) and simulated (y-axis) rainfall time series wet periods ( $> (1/24)/1000$  m), (a) ERA5-land data and Realisation 1. All data shown (grey crosses), January presented in aggregation intervals as fractions of a month as coloured squares.**

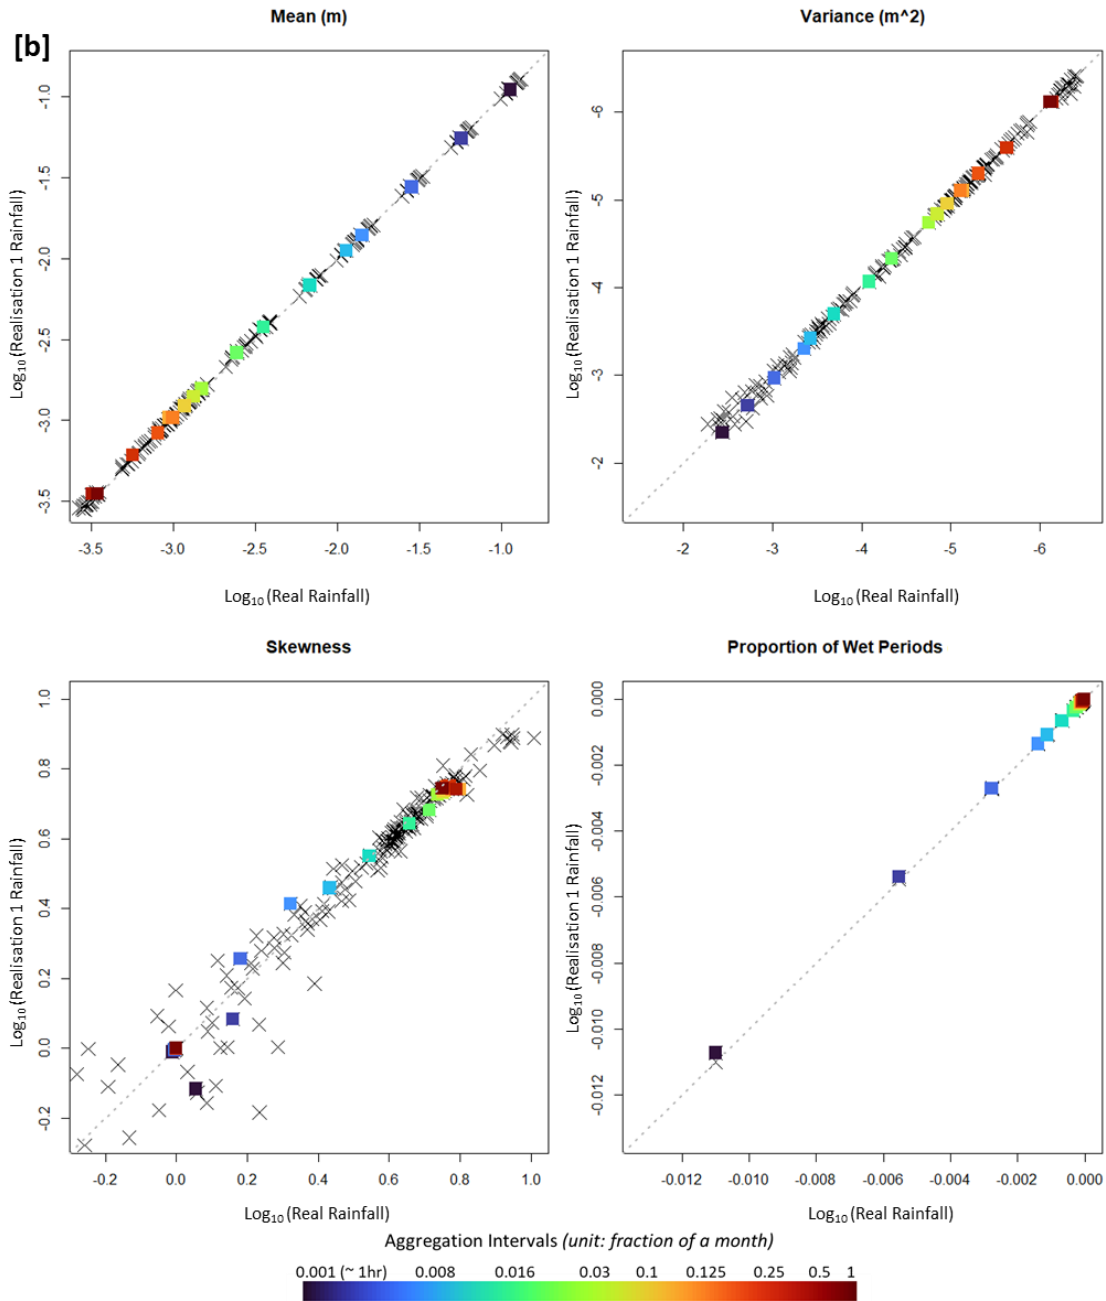

110

**Figure S5:** Mean, variance, skewness, and proportion of wet periods of the observed (x-axis) and simulated (y-axis) rainfall time series wet periods ( $> (1/24)/1000$  m), (b) ERA5-land data and Realisation 1. All data shown (grey crosses), April presented in aggregation intervals as fractions of a month as coloured squares.

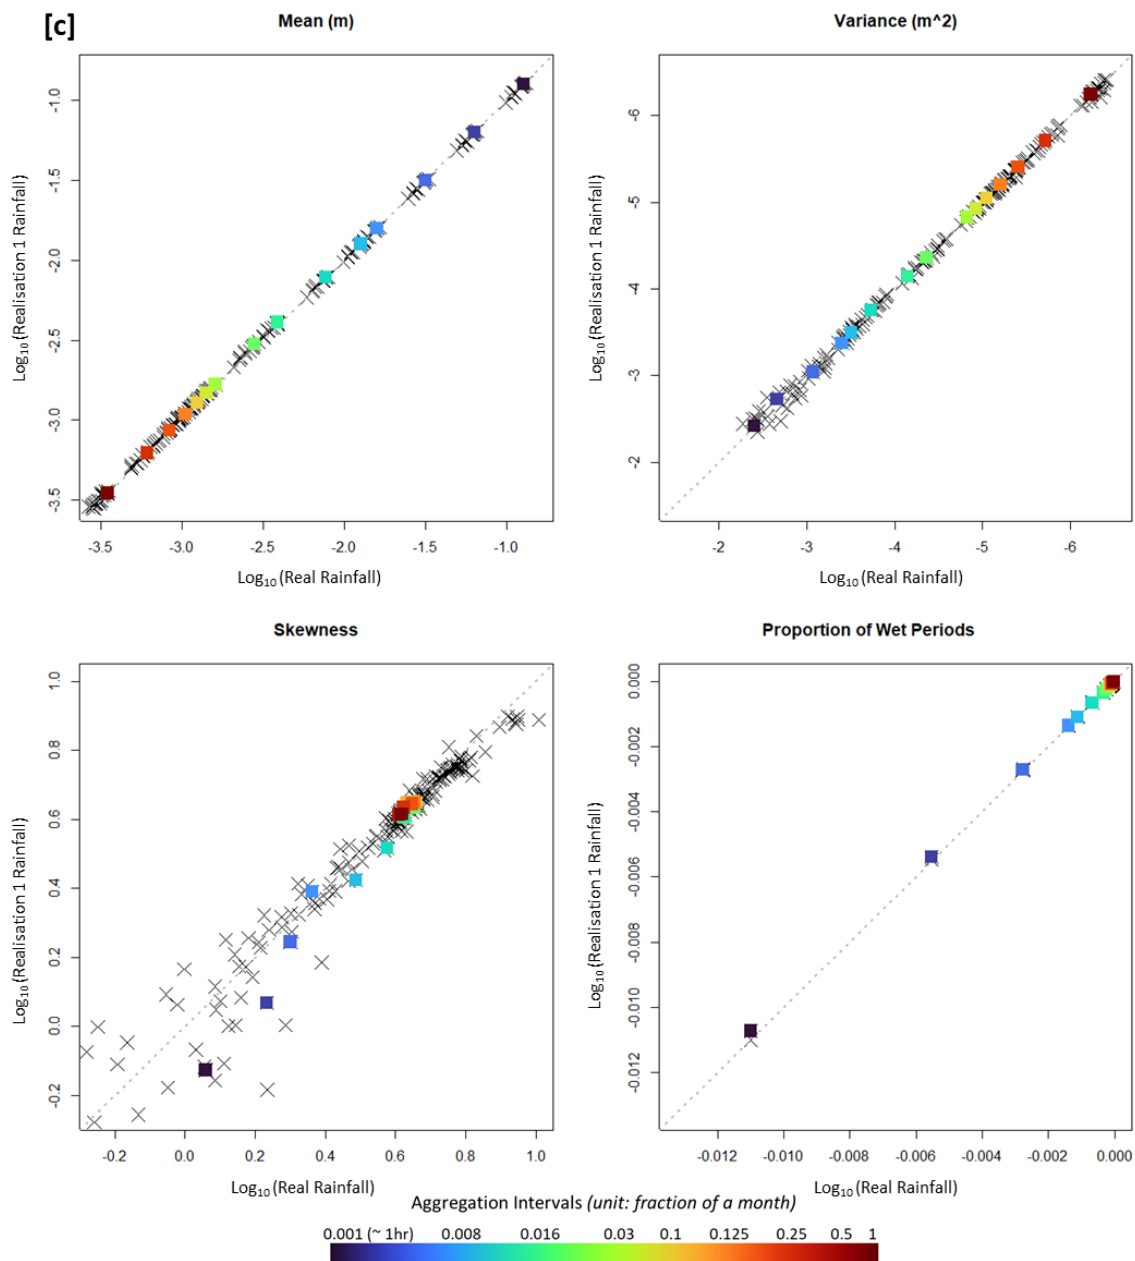

120 **Figure S5: Mean, variance, skewness, and proportion of wet periods of the observed (x-axis) and simulated (y-axis) rainfall time series wet periods ( $> (1/24)/1000$  m), (c) ERA5-land data and Realisation 1. All data shown (grey crosses), July presented in aggregation intervals as fractions of a month as coloured squares.**

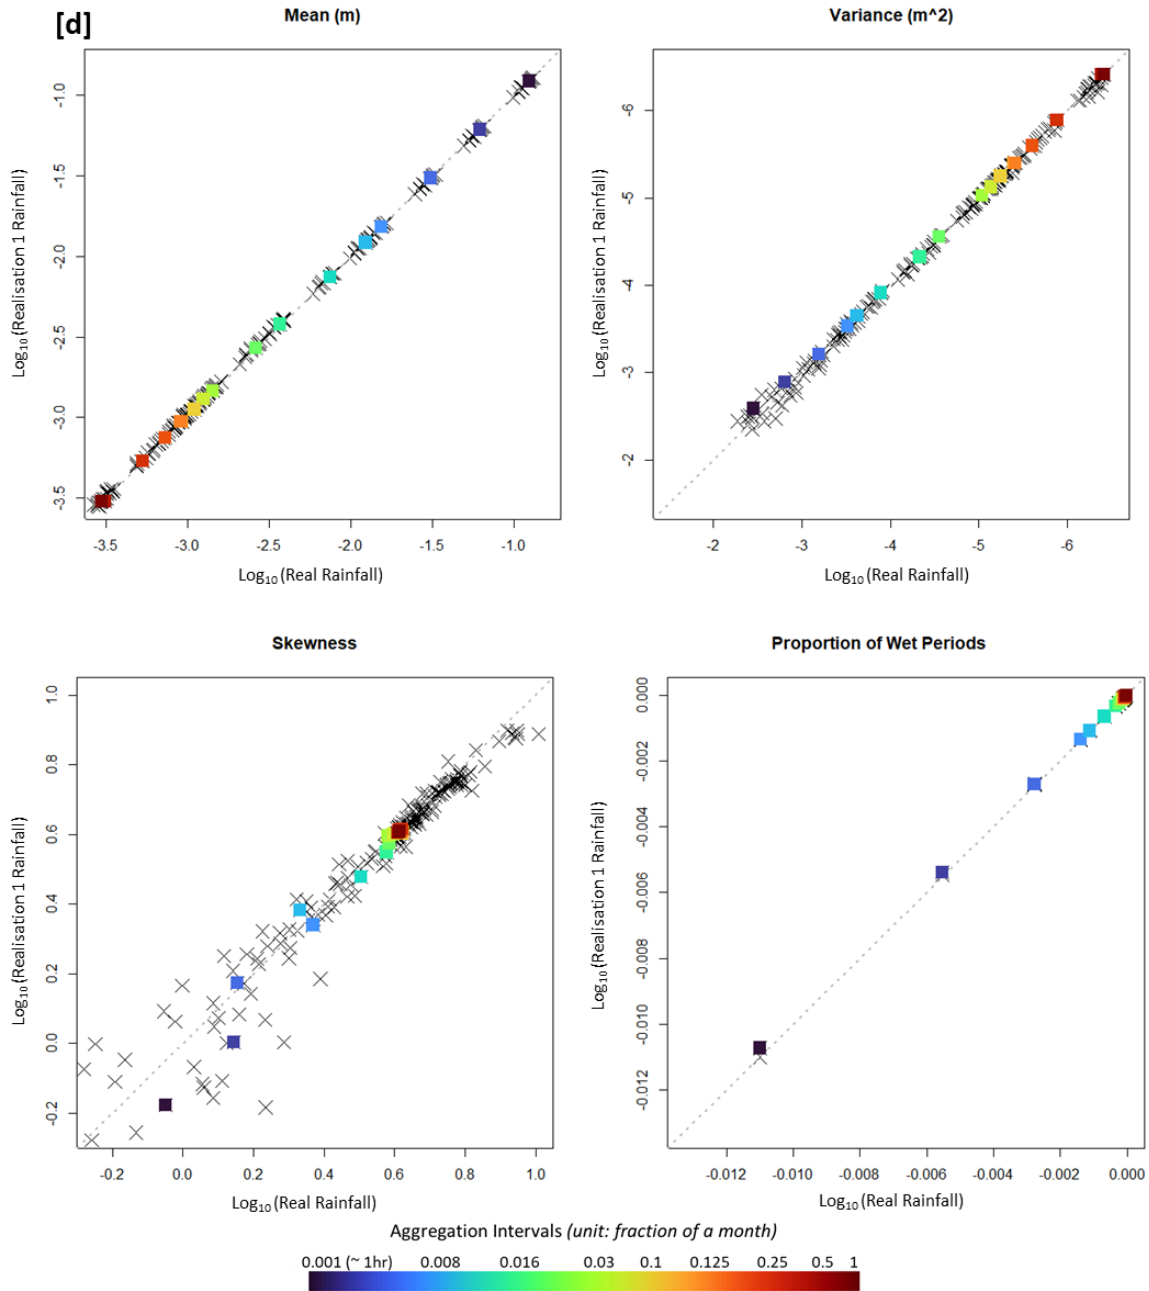

125 **Figure S5:** Mean, variance, skewness, and proportion of wet periods of the observed (x-axis) and simulated (y-axis) rainfall time series wet periods ( $> (1/24)/1000$  m), (d) ERA5-land data and Realisation 1. All data shown (grey crosses), October presented in aggregation intervals as fractions of a month as coloured squares.

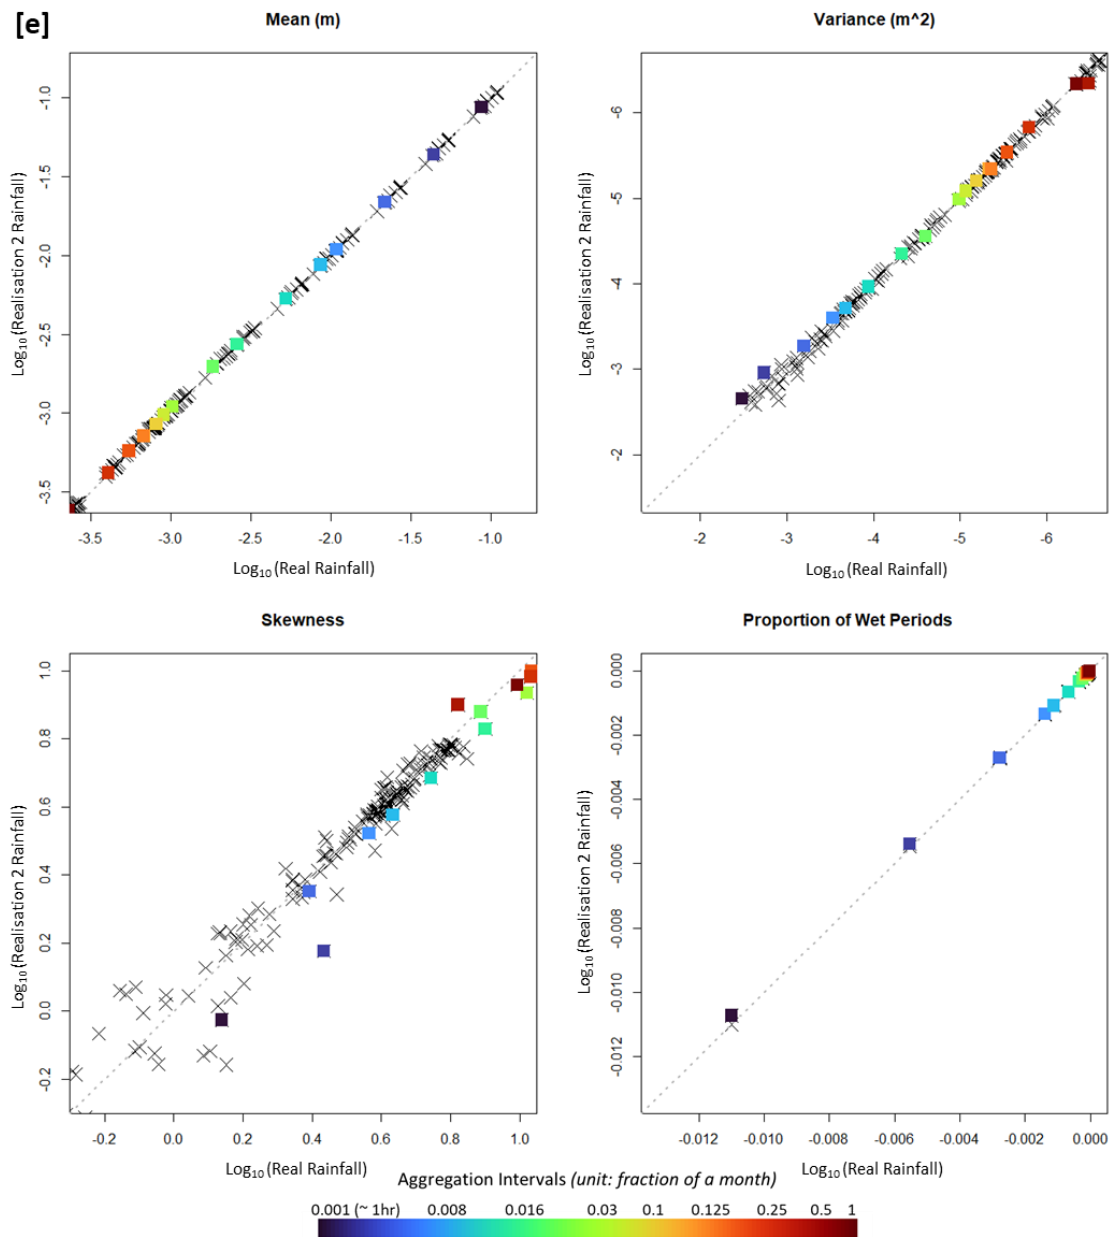

**Figure S5: Mean, variance, skewness, and proportion of wet periods of the observed (x-axis) and simulated (y-axis) rainfall time series wet periods ( $> (1/24)/1000$  m), (e) ERA5-land data and Realisation 2. All data shown (grey crosses), January presented in aggregation intervals as fractions of a month as coloured squares.**

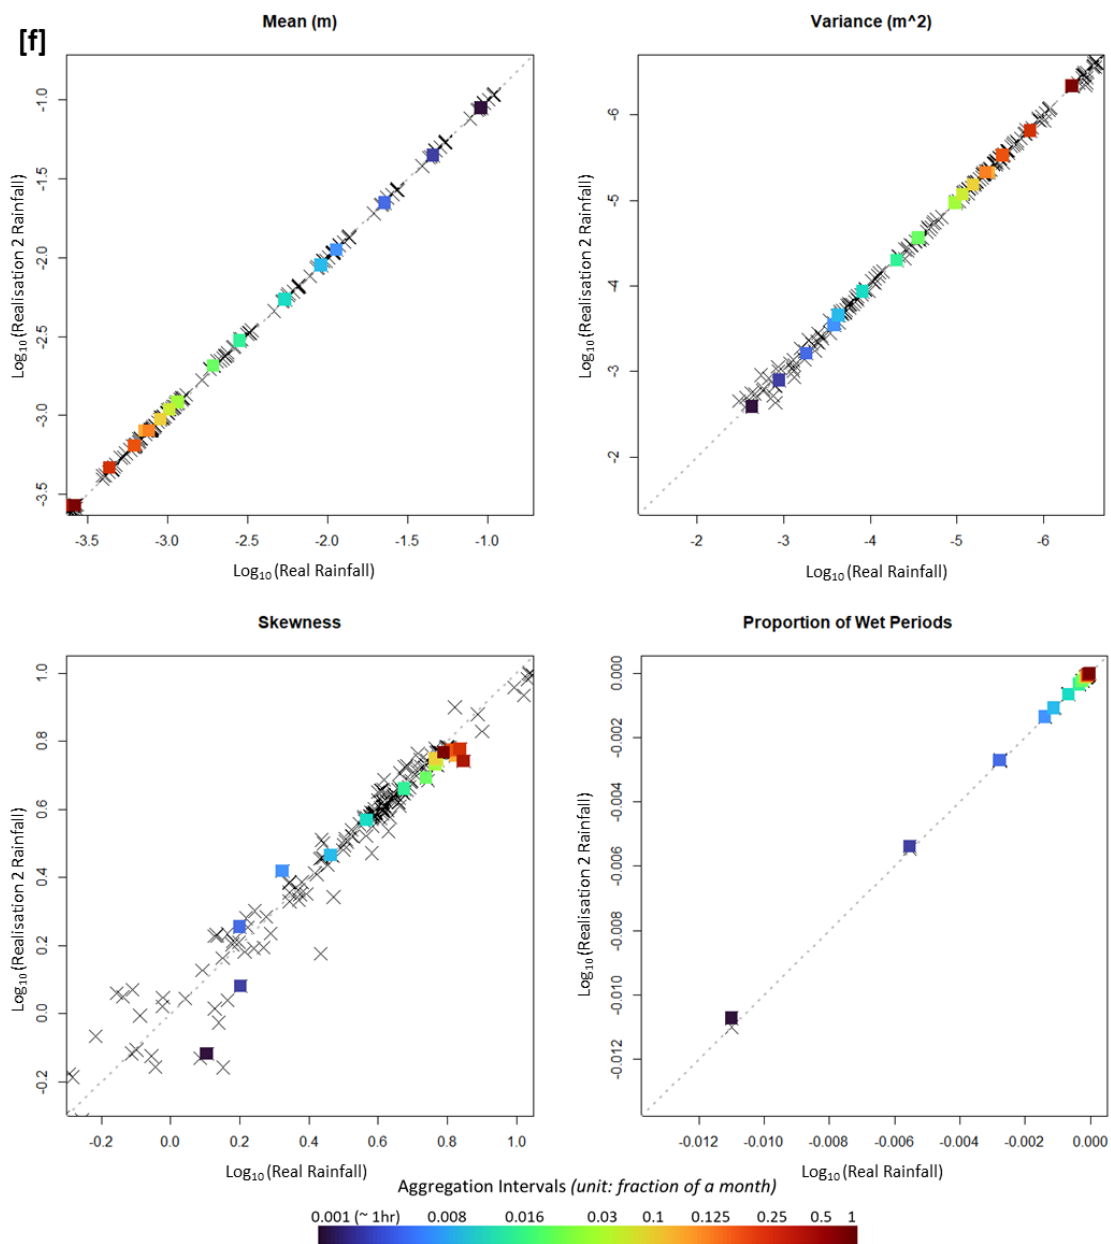

140

**Figure S5: Mean, variance, skewness, and proportion of wet periods of the observed (x-axis) and simulated (y-axis) rainfall time series wet periods ( $> (1/24)/1000$  m), (f) ERA5-land data and Realisation 2. All data shown (grey crosses), April presented in aggregation intervals as fractions of a month as coloured squares.**

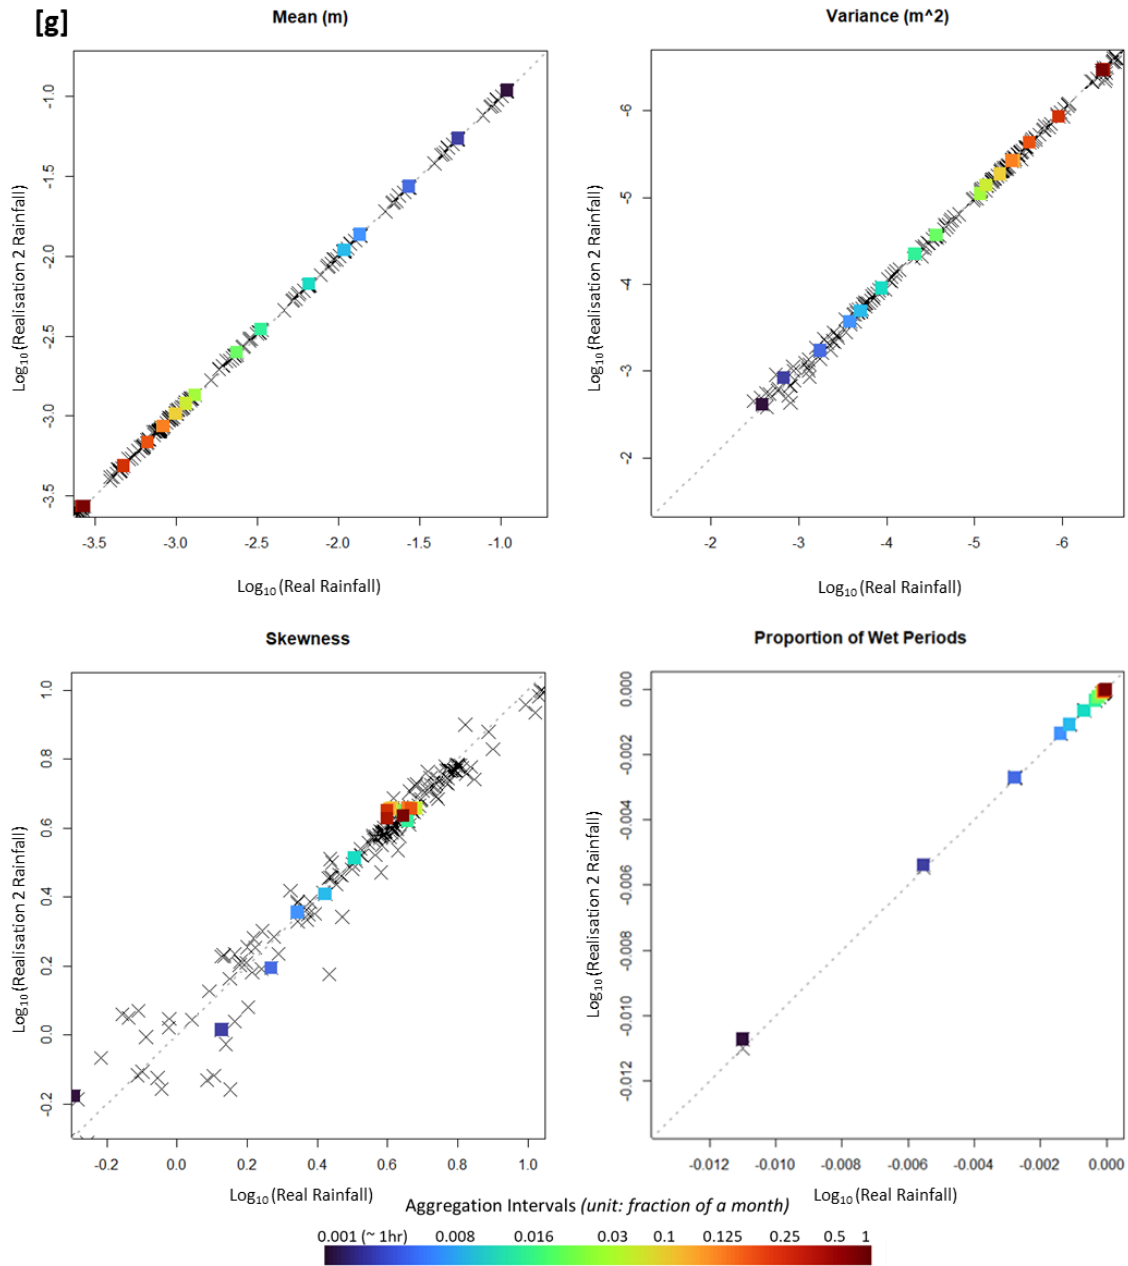

145

**Figure S5:** Mean, variance, skewness, and proportion of wet periods of the observed (x-axis) and simulated (y-axis) rainfall time series wet periods ( $> (1/24)/1000$  m), (g) ERA5-land data and Realisation 2. All data shown (grey crosses), July presented in aggregation intervals as fractions of a month as coloured squares.

150



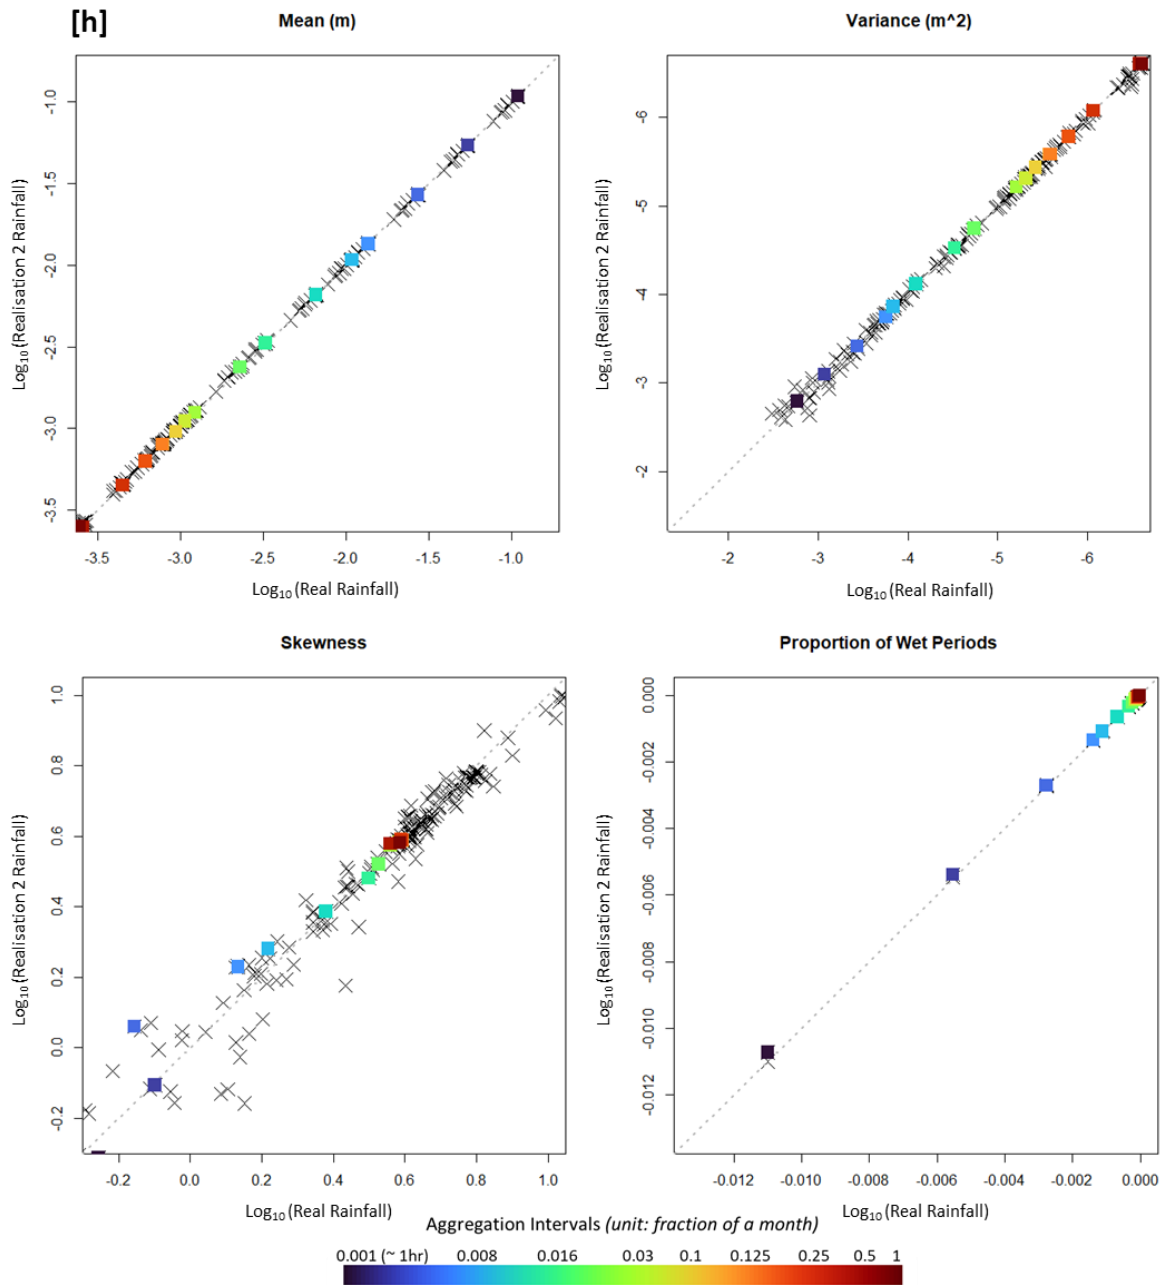

155 **Figure S5: Mean, variance, skewness, and proportion of wet periods of the observed (x-axis) and simulated (y-axis) rainfall time series wet periods ( $> (1/24)/1000$  m), (h) ERA5-land data and Realisation 2. All data shown (grey crosses), October presented in aggregation intervals as fractions of a month as coloured squares.**

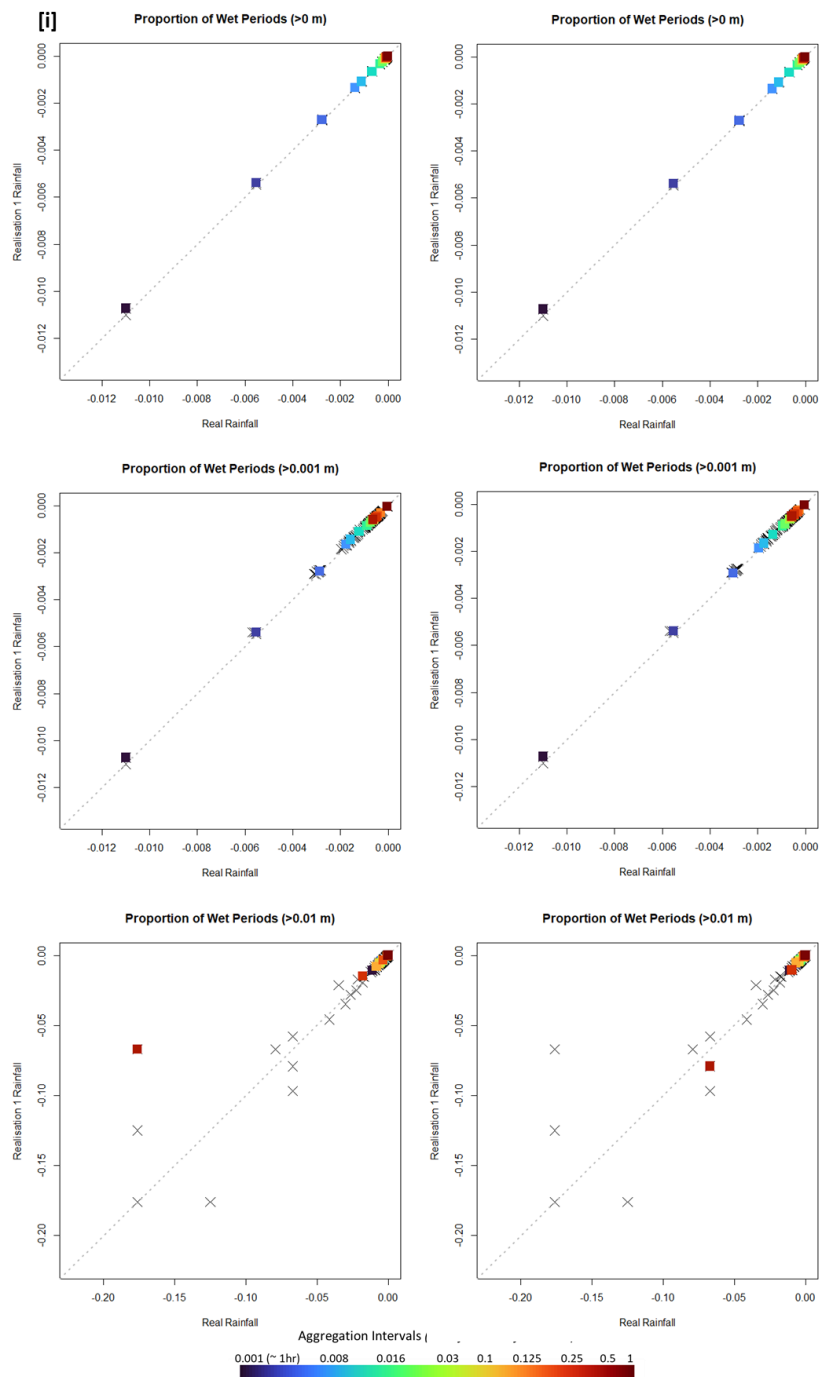

Figure S5: Variation in proportion of wet periods by with change in “wet” definition of the observed (x-axis) and simulated (y-axis) rainfall time series wet periods, (i) ERA5-land data and Realisation 1. All data shown (grey crosses), January (left column), April (right column), presented in aggregation intervals as fractions of a month as coloured squares, Proportions (top to bottom), are  $\{> 0 \text{ m}, > 0.001 \text{ m}, > 0.01 \text{ m}\}$ .

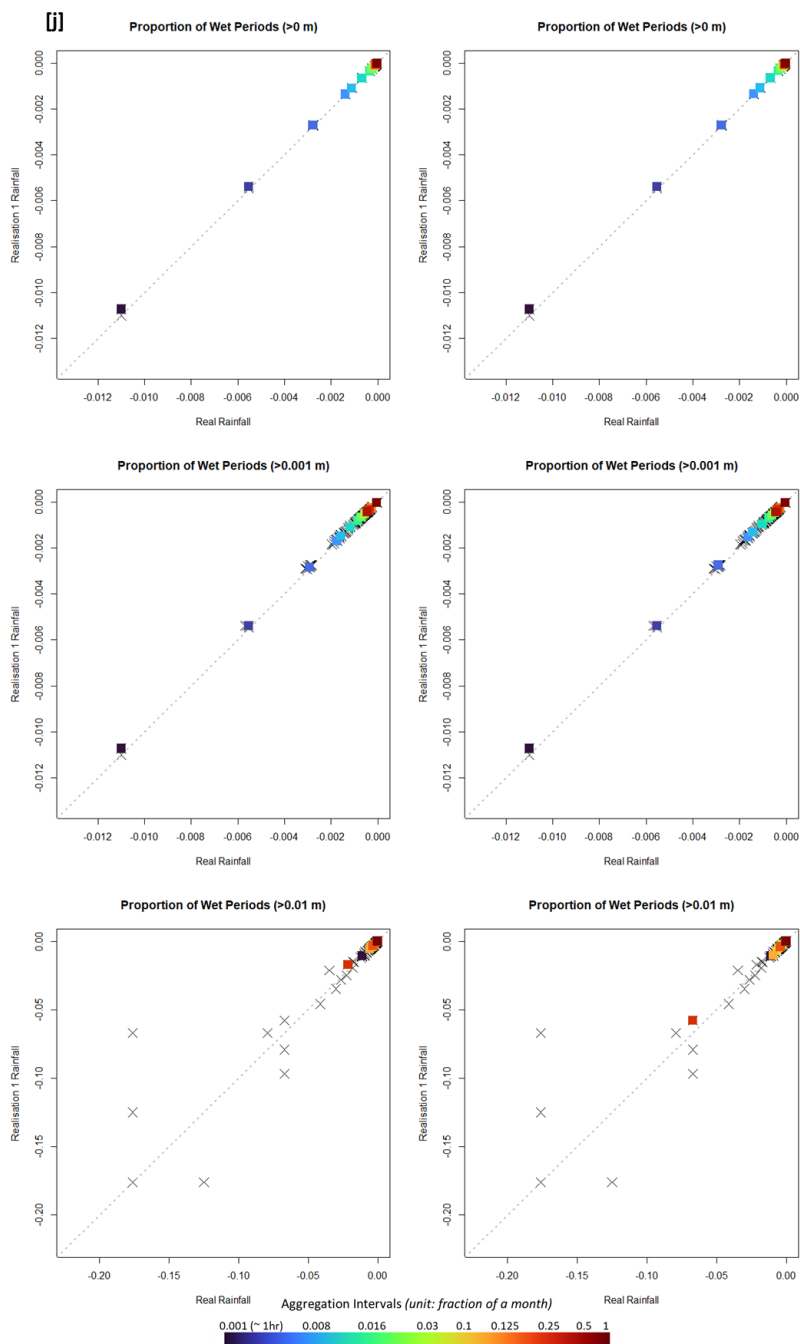

165 **Figure S5: Variation in proportion of wet periods by with change in “wet” definition of the observed (x-axis) and simulated (y-axis) rainfall time series wet periods, (j) ERA5-land data and Realisation 1. All data shown (grey crosses), July (left column), October (right column), presented in aggregation intervals as fractions of a month as coloured squares, Proportions (top to bottom), are {> 0 m, > 0,001 m, > 0.01 m}.**

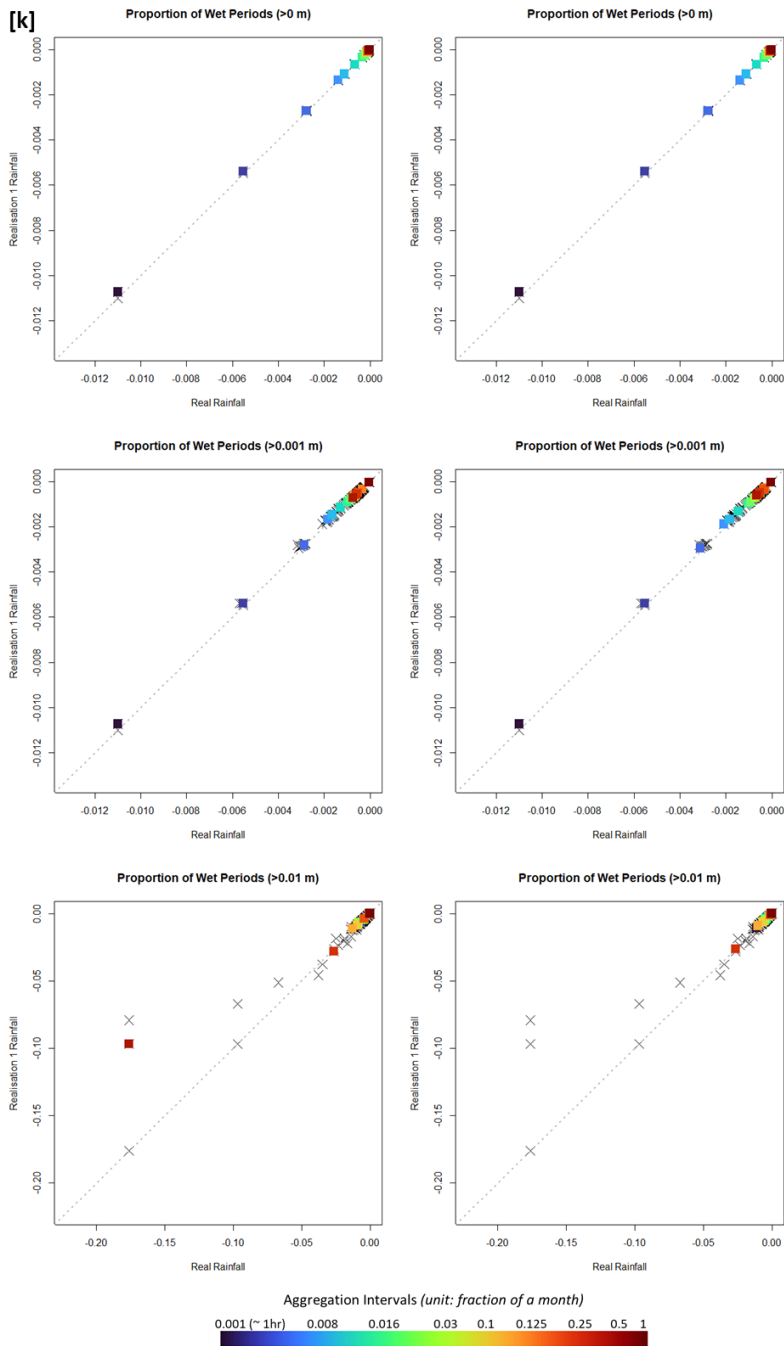

170 **Figure S5: Variation in proportion of wet periods by with change in “wet” definition of the observed (x-axis) and simulated (y-axis) rainfall time series wet periods, (k) ERA5-land data and Realisation 2. All data shown (grey crosses), January (left column), April (right column), presented in aggregation intervals as fractions of a month as coloured squares, Proportions (top to bottom), are {> 0 m, > 0,001 m, > 0.01 m}.**

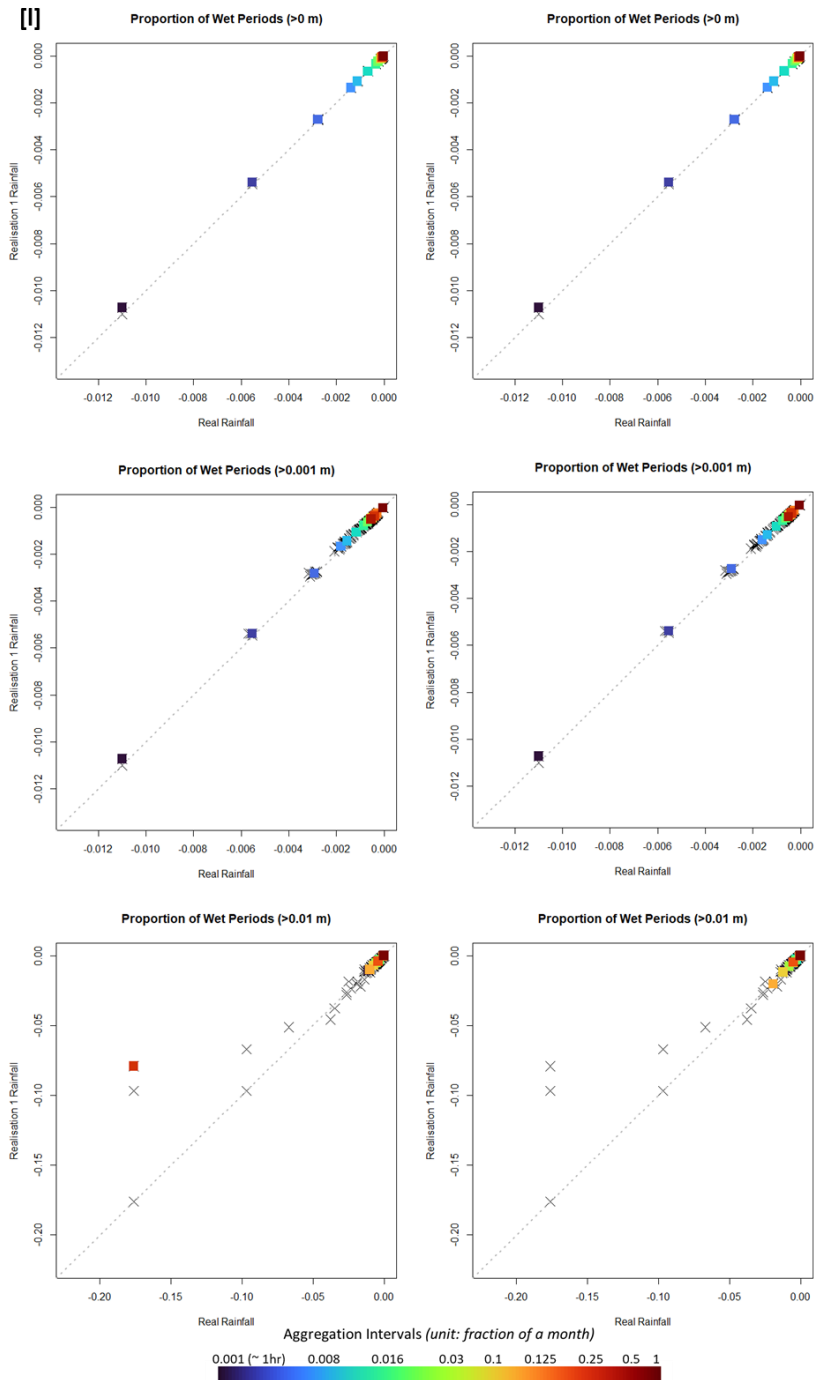

175 **Figure S5: Variation in proportion of wet periods by with change in “wet” definition of the observed (x-axis) and simulated (y-axis) rainfall time series wet periods, (l) ERA5-land data and Realisation 2. All data shown (grey crosses), July (left column), October (right column), presented in aggregation intervals as fractions of a month as coloured squares, Proportions (top to bottom), are  $\{> 0$  m,  $> 0.001$  m,  $> 0.01$  m}.**

## References

- 180 Fox, J. and Weisberg S.: An R Companion to Applied Regression, Third edition, Sage Publications, Thousand Oaks CA, USA, 576 pp., <https://socialsciences.mcmaster.ca/jfox/Books/Companion/>, 2019.
- Royston, P.: An extension of Shapiro and Wilk's W test for normality to large samples. *Appl. Stat.*, 31, 115–124, <https://doi.org/10.2307/2347973>, 1982.
- 185 Student.: The probable error of a mean, *Biometrika*, 1–25, 1908.
- Venables, W.N. and Ripley, B. D.: *Modern Applied Statistics with S*. Fourth Edition, Springer Series in Statistics and Computing, Springer-Verlag, New York, NY, 498 pp., <https://doi.org/10.1007/978-0-387-21706-2>, 2002.
